# Supplementary material for: Charge distribution and aromaticity in protonated urazole
Source: Royal Society of Chemistry journal article supplement (doi:10.1039/d5cc00218d), 2025-01-01
Supplement: d5cc00218d1.pdf [file d5cc00218d1.pdf]

## Supporting Information

## Supporting Information

# Contents

|                                              |           |
|----------------------------------------------|-----------|
| <b>1. Experimental Details</b>               | <b>6</b>  |
| <b>2. Vibrational Data</b>                   | <b>9</b>  |
| 2.1 Urazole and its protonated derivatives   | 9         |
| <b>3. Crystal structures</b>                 | <b>15</b> |
| 3.1 $[C_2N_3H_3O(OH)][SbF_6]$                | 15        |
| 3.2 $[C_2N_3H_3(OH)_2][Ge_2F_{10}]$          | 20        |
| 3.3 $[C_2N_3H_3(OH)_2][(AsF_6)_2]$           | 28        |
| 3.4 $[C_2N_3H_3(OH)_2][(SbF_6)_2] \cdot 2HF$ | 34        |
| <b>4. NMR data</b>                           | <b>40</b> |
| 4.1 Urazole                                  | 40        |
| 4.2 $[C_2N_3H_3O(OH)][SbF_6]$                | 42        |
| 4.3 $[C_2N_3H_3(OH)_2][(SbF_6)_2]$           | 44        |
| <b>5. Quantum chemical calculations</b>      | <b>47</b> |
| 5.1 Urazole                                  | 47        |
| 5.2 $[C_2N_3H_3O(OH)]$                       | 50        |
| 5.3 $[C_2N_3H_3(OH)_2]$                      | 53        |
| 5.4 NPA charges                              | 56        |
| <b>6. Literature</b>                         | <b>60</b> |

## List of Figures

|                                                                                                                                                                                                        |    |
|--------------------------------------------------------------------------------------------------------------------------------------------------------------------------------------------------------|----|
| Figure 1: Raman spectra of urazole, $[C_2H_3N_3O(OH)][SbF_6]$ , $[C_2H_3N_3O(OH)][BF_4]$ , $[C_2H_3N_3(OH)_2][Ge_2F_{10}]$ , $[C_2H_3N_3(OH)_2][(SbF_6)_2]$ and $[C_2H_3N_3(OH)_2][(AsF_6)_2]$ . ..... | 9  |
| Figure 2: Asymmetric unit of $[C_2N_3H_3O(OH)][SbF_6]$ .....                                                                                                                                           | 15 |
| Figure 3: Cation-cation contacts in $[C_2N_3H_3O(OH)][SbF_6]$ .....                                                                                                                                    | 17 |
| Figure 4: Asymmetric unit of $[C_2N_3H_3(OH)_2][Ge_2F_{10}]$ .....                                                                                                                                     | 20 |
| Figure 5: Packing of $[C_2N_3H_3(OH)_2][Ge_2F_{10}]$ .....                                                                                                                                             | 21 |
| Figure 6: Particular hydrogen bonds of $[C_2N_3H_3(OH)_2][Ge_2F_{10}]$ .....                                                                                                                           | 22 |

|                                                                                                                                                                   |    |
|-------------------------------------------------------------------------------------------------------------------------------------------------------------------|----|
| Figure 7: Asymmetric unit of $[\text{C}_2\text{N}_3\text{H}_3(\text{OH})_2][(\text{AsF}_6)_2]$ , .....                                                            | 28 |
| Figure 8: Particular hydrogen bonds of $[\text{C}_2\text{N}_3\text{H}_3(\text{OH})_2][(\text{AsF}_6)_2]$ .....                                                    | 29 |
| Figure 9: Asymmetric unit of $[\text{C}_2\text{N}_3\text{H}_3(\text{OH})_2][(\text{SbF}_6)_2] \cdot 2\text{HF}$ .....                                             | 34 |
| Figure 10: Particular hydrogen bonds of $[\text{C}_2\text{N}_3\text{H}_3(\text{OH})_2][(\text{SbF}_6)_2] \cdot 2\text{HF}$ .....                                  | 35 |
| Figure 11: Optimized structure of urazole.....                                                                                                                    | 47 |
| Figure 12: NPA charges of urazole.....                                                                                                                            | 48 |
| Figure 13: Molecular $0.0004 \text{ bohr}^{-3}$ 3D isosurfaces with mapped electrostatic potential of urazole.....                                                | 49 |
| Figure 14: Optimized structure of $[\text{C}_2\text{N}_3\text{H}_3\text{O}(\text{OH})]$ .....                                                                     | 50 |
| Figure 15: NPA charges of $[\text{C}_2\text{N}_3\text{H}_3\text{O}(\text{OH})]$ .....                                                                             | 51 |
| Figure 16: Molecular $0.0004 \text{ bohr}^{-3}$ 3D isosurfaces with mapped electrostatic potential of $[\text{C}_2\text{N}_3\text{H}_3\text{O}(\text{OH})]$ ..... | 52 |
| Figure 17: Optimized structure of $[\text{C}_2\text{N}_3\text{H}_3(\text{OH})_2]$ .....                                                                           | 53 |
| Figure 18: NPA charges of $[\text{C}_2\text{N}_3\text{H}_3(\text{OH})_2]$ .....                                                                                   | 54 |
| Figure 19: Molecular $0.0004 \text{ bohr}^{-3}$ 3D isosurfaces with mapped electrostatic potential of $[\text{C}_2\text{N}_3\text{H}_3(\text{OH})_2]$ .....       | 55 |
| Figure 20: NPA charges of urazole and its protonated derivatives.....                                                                                             | 56 |
| Figure 21: Difference in NPA charges of the respective protonated species vs urazole. ..                                                                          | 57 |
| Figure 22: NPA charges of parabanic acid and its protonated derivatives.....                                                                                      | 58 |
| Figure 23: Difference in NPA charges of the respective protonated species vs parabanic acid.....                                                                  | 59 |

## **List of Tables**

|                                                                                                                                                                                                                                      |    |
|--------------------------------------------------------------------------------------------------------------------------------------------------------------------------------------------------------------------------------------|----|
| Table 1: Observed vibrational frequencies and calculated vibrational frequencies of urazole .....                                                                                                                                    | 9  |
| Table 2: Observed vibrational frequencies and calculated vibrational frequencies of $[\text{C}_2\text{H}_3\text{N}_3\text{O}(\text{OH})][\text{MF}_y]$ .....                                                                         | 11 |
| Table 3: Observed vibrational frequencies and calculated vibrational frequencies of $[\text{C}_2\text{H}_3\text{N}_3(\text{OH})_2][\text{MF}_6]$ and $[\text{C}_2\text{H}_3\text{N}_3(\text{OH})_2][\text{Ge}_2\text{F}_{10}]$ ..... | 12 |
| Table 4: Bond lengths ( $\text{\AA}$ ) of $[\text{C}_2\text{N}_3\text{H}_3\text{O}(\text{OH})][\text{SbF}_6]$ .....                                                                                                                  | 15 |
| Table 5: Particular H-bond lengths ( $\text{\AA}$ ) for $[\text{C}_2\text{N}_3\text{H}_3\text{O}(\text{OH})][\text{SbF}_6]$ .....                                                                                                    | 17 |
| Table 6: Data collection and structure refinement for $[\text{C}_2\text{N}_3\text{H}_3\text{O}(\text{OH})][\text{SbF}_6]$ .....                                                                                                      | 17 |
| Table 7: Bond angles ( $^\circ$ ) for $[\text{C}_2\text{N}_3\text{H}_3\text{O}(\text{OH})][\text{SbF}_6]$ .....                                                                                                                      | 18 |

|                                                                                                                                                                                      |    |
|--------------------------------------------------------------------------------------------------------------------------------------------------------------------------------------|----|
| Table 8: Anisotropic atomic displacement parameters ( $\text{\AA}^2$ ) for $[\text{C}_2\text{N}_3\text{H}_3\text{O}(\text{OH})][\text{SbF}_6]$ .....                                 | 19 |
| Table 9: Bond lengths ( $\text{\AA}$ ) of $[\text{C}_2\text{N}_3\text{H}_3(\text{OH})_2][\text{Ge}_2\text{F}_{10}]$ . .....                                                          | 20 |
| Table 10: Particular H-bond lengths ( $\text{\AA}$ ) for $[\text{C}_2\text{N}_3\text{H}_3(\text{OH})_2][\text{Ge}_2\text{F}_{10}]$ . .....                                           | 22 |
| Table 11: Data collection and structure refinement for $[\text{C}_2\text{N}_3\text{H}_3(\text{OH})_2][\text{Ge}_2\text{F}_{10}]$ .....                                               | 24 |
| Table 12: Bond angles ( $^\circ$ ) for $[\text{C}_2\text{N}_3\text{H}_3(\text{OH})_2][\text{Ge}_2\text{F}_{10}]$ .....                                                               | 25 |
| Table 13: Anisotropic atomic displacement parameters ( $\text{\AA}^2$ ) for $[\text{C}_2\text{N}_3\text{H}_3(\text{OH})_2][\text{Ge}_2\text{F}_{10}]$ . ..                           | 26 |
| Table 14: Bond lengths ( $\text{\AA}$ ) of $[\text{C}_2\text{N}_3\text{H}_3(\text{OH})_2][(\text{AsF}_6)_2]$ . .....                                                                 | 28 |
| Table 15: Particular H-bond lengths ( $\text{\AA}$ ) for $[\text{C}_2\text{N}_3\text{H}_3(\text{OH})_2][(\text{AsF}_6)_2]$ . .....                                                   | 30 |
| Table 16: Data collection and structure refinement for $[\text{C}_2\text{N}_3\text{H}_3(\text{OH})_2][(\text{AsF}_6)_2]$ . .....                                                     | 30 |
| Table 17: Bond angles ( $^\circ$ ) for $[\text{C}_2\text{N}_3\text{H}_3(\text{OH})_2][(\text{AsF}_6)_2]$ .....                                                                       | 31 |
| Table 18: Anisotropic atomic displacement parameters ( $\text{\AA}^2$ ) for $[\text{C}_2\text{N}_3\text{H}_3(\text{OH})_2][(\text{AsF}_6)_2]$ . ..                                   | 32 |
| Table 19: Bond lengths ( $\text{\AA}$ ) of $[\text{C}_2\text{N}_3\text{H}_3(\text{OH})_2][(\text{SbF}_6)_2] \cdot 2\text{HF}$ . .....                                                | 34 |
| Table 20: Particular H-bond lengths ( $\text{\AA}$ ) for $[\text{C}_2\text{N}_3\text{H}_3(\text{OH})_2][(\text{SbF}_6)_2] \cdot 2\text{HF}$ . .....                                  | 35 |
| Table 21: Data collection and structure refinement for $[\text{C}_2\text{N}_3\text{H}_3(\text{OH})_2][(\text{SbF}_6)_2] \cdot 2\text{HF}$ . ....                                     | 36 |
| Table 22: Bond angles ( $^\circ$ ) for $[\text{C}_2\text{N}_3\text{H}_3(\text{OH})_2][(\text{SbF}_6)_2] \cdot 2\text{HF}$ .....                                                      | 37 |
| Table 23: Anisotropic atomic displacement parameters ( $\text{\AA}^2$ ) for $[\text{C}_2\text{N}_3\text{H}_3(\text{OH})_2][(\text{SbF}_6)_2] \cdot 2\text{HF}$ .....                 | 38 |
| Table 24: Comparison of bond lengths ( $\text{\AA}$ ) of urazole, $[\text{C}_2\text{N}_3\text{H}_3\text{O}(\text{OH})]$ and $[(\text{C}_2\text{N}_3\text{H}_3(\text{OH})_2]$ . ..... | 39 |

## **List of Images**

|                                                                                                                           |    |
|---------------------------------------------------------------------------------------------------------------------------|----|
| Image 1: Crystals of $[\text{C}_2\text{N}_3\text{H}_3(\text{OH})_2][\text{Ge}_2\text{F}_{10}]$ under the microscope. .... | 23 |
|---------------------------------------------------------------------------------------------------------------------------|----|

## 1. Experimental Details

**Caution!** Anhydrous HF, BF<sub>3</sub>, GeF<sub>4</sub>, AsF<sub>5</sub>, and SbF<sub>5</sub> can cause severe burns and contact with the skin must be avoided and the compounds should only be handled in a well-ventilated fume hood. Any of the described formed salts may form HF by hydrolysis.

### *Materials and apparatus:*

All reactions were carried out either in FEP/PFA reactors closed with a stainless steel valve, employing standard Schlenk technique with a stainless steel vacuum line. HF was dried with F<sub>2</sub> prior to use.

Raman spectra were recorded on a Bruker MultiRAM FT-Raman spectrometer with Nd:YAG laser excitation ( $\lambda = 1064$  nm). For Raman measurements, samples of products were transferred into a cooled glass cell, which were evacuated afterwards. The educts were transferred into NMR tubes and measured at room temperature.

NMR spectra were recorded on a Jeol ECX400 NMR instrument. The spectrometer was externally referenced to CFCl<sub>3</sub> for <sup>19</sup>F, CH<sub>3</sub>NO<sub>2</sub> for <sup>14</sup>N and to tetramethylsilane for <sup>1</sup>H and <sup>13</sup>C NMR spectra. The spectra were recorded inside 4 mm FEP NMR tube liners. Acetone-d<sub>6</sub> was employed for external shimming when aHF was used as solvent for the respective compounds. The NMR samples were prepared by (re-)dissolving the respective compound at the designated measuring temperature in aHF and transferring the solution into a 4 mm FEP NMR tube inliner. The inliner was then frozen and flame sealed. For visualization and evaluation MestReNova Version 12.0.2 was employed.<sup>[1]</sup>

The low-temperature X-ray diffraction of was performed with an Oxford X-Calibur3 equipped with a Kappa CCD detector, operating with Mo-K<sub>α</sub> radiation ( $\lambda = 0.71073$  Å) and a Spellman generator (voltage 50 kV, current 40 mA). The program CrysAlisPro 1.171.38.46 (Rigaku OD, 2015)<sup>[2]</sup> was employed for the data collection and reduction. The structures were solved utilizing SHELXT<sup>[3]</sup> and SHELXL-2018/3<sup>[4]</sup> of the WINGX software package.<sup>[5]</sup> The structures were checked using the software PLATON.<sup>[6]</sup> The absorption correction was performed using the SCALE3 ABSPACK multiscan method.<sup>[7]</sup> Visualization was done by Mercury 2020.2.0.<sup>[8]</sup>

### *Computational methods:*

All here presented calculations were done using DFT, B3LYP/6-311G++(3d2f,3p2d) level of theory by Gaussian 16.<sup>[9]</sup> NMR calculations were done using the GIAO method on the described level. Mapped Electrostatic Potentials were calculated using DFT, B3LYP/6-311G++(3df, 2pd) level of theory by Gaussian 09.<sup>[10]</sup>

### *Preparations:*

Urazole was used without further purification. Urazole (98%) were purchased from abcr. Purity was checked by NMR and Raman spectroscopy.

### *Synthesis of $[C_2N_3H_3O(OH)][SbF_6]$ :*

Antimony pentafluoride (135 mg, 0.62 mmol, 1 eq.) and anhydrous HF (ca. 3 mL) were condensed into an FEP reactor at  $-196^\circ\text{C}$ . The mixture was homogenized at  $-40^\circ\text{C}$  for 15 min. After freezing the solution, urazole (63 mg, 0.62 mmol, 1 eq.) was added under nitrogen atmosphere. Followed by removing the nitrogen from the reaction vessel, the mixture was warmed to  $-40^\circ\text{C}$  and vigorously mixed. The mixture was then cooled down to  $-78^\circ\text{C}$ , so that excess aHF could be removed from the system.  $[C_2N_3H_3O(OH)][SbF_6]$  was obtained as a colorless solid, which was stable at room temperature over some hours.

### *Synthesis of $[C_2N_3H_3O(OH)][BF_3]$ :*

Boron trifluoride (68 mg, 1 mmol, 4 eq.) and anhydrous HF (ca. 3 mL) were condensed into an FEP reactor at  $-196^\circ\text{C}$ . The mixture was homogenized at  $-40^\circ\text{C}$  for 15 min. After freezing the solution, urazole (25 mg, 0.25 mmol, 1 eq.) was added under nitrogen atmosphere. Followed by removing the nitrogen from the reaction vessel, the mixture was warmed to  $-40^\circ\text{C}$  and vigorously mixed. The mixture was then cooled down to  $-78^\circ\text{C}$ , so that excess aHF could be removed from the system.  $[C_2N_3H_3O(OH)][BF_4]$  was obtained as a colorless solid, which was stable at room temperature over some minutes.

### *Synthesis of $[C_2N_3H_3(OH)_2][(SbF_6)_2]$ :*

Antimony pentafluoride (120 mg, 0.55 mmol, 3 eq.) and anhydrous HF (ca. 3 mL) were condensed into an FEP reactor at  $-196^\circ\text{C}$ . The mixture was homogenized at  $-40^\circ\text{C}$  for 15 min. After freezing the solution, urazole (19 mg, 0.18 mmol, 1 eq.) was added under

nitrogen atmosphere. Followed by removing the nitrogen from the reaction vessel, the mixture was warmed to  $-40^{\circ}\text{C}$  and vigorously mixed. The mixture was then cooled down to  $-78^{\circ}\text{C}$ , so that excess aHF could be removed from the system.  $[\text{C}_2\text{N}_3\text{H}_3\text{O}(\text{OH})][\text{SbF}_6]$  was obtained as a colorless solid, which was stable at room temperature over some hours.

*Synthesis of  $[\text{C}_2\text{N}_3\text{H}_3(\text{OH})_2][(\text{AsF}_6)_2]$ :*

Arsenic pentafluoride (204 mg, 1.2 mmol, 3 eq.) and anhydrous HF (ca. 3 mL) were condensed into an FEP reactor at  $-196^{\circ}\text{C}$ . The mixture was homogenized at  $-40^{\circ}\text{C}$  for 15 min. After freezing the solution, urazole (25 mg, 0.25 mmol, 1 eq.) was added under nitrogen atmosphere. Followed by removing the nitrogen from the reaction vessel, the mixture was warmed to  $-40^{\circ}\text{C}$  and vigorously mixed. The mixture was then cooled down to  $-78^{\circ}\text{C}$ , so that excess aHF could be removed from the system.  $[\text{C}_2\text{N}_3\text{H}_3(\text{OH})_2][(\text{AsF}_6)_2]$  was obtained as a colorless solid, which was stable at room temperature over some minutes.

*Synthesis of  $[(\text{C}_2\text{N}_3\text{H}_3(\text{OH}))_2][\text{Ge}_2\text{F}_{10}]$ :*

Germanium tetrafluoride (178 mg, 1.2 mmol, 3 eq.) and anhydrous HF (ca. 3 mL) were condensed into an FEP reactor at  $-196^{\circ}\text{C}$ . The mixture was homogenized at  $-40^{\circ}\text{C}$  for 15 min. After freezing the solution, urazole (40 mg, 0.4 mmol, 1 eq.) was added under nitrogen atmosphere. Followed by removing the nitrogen from the reaction vessel, the mixture was warmed to  $-50^{\circ}\text{C}$  and vigorously mixed. The mixture was then cooled down to  $-78^{\circ}\text{C}$ , so that excess aHF could be removed from the system.  $[(\text{C}_2\text{N}_3\text{H}_3(\text{OH}))_2][\text{Ge}_2\text{F}_{10}]$  was obtained as a colorless solid, which was stable at room temperature over some minutes.



## 2. Vibrational Data

### 2.1 Urazole and its protonated derivatives

Underlined numbers in the listings of the measured Raman frequencies indicate vibrations of the respective anions.

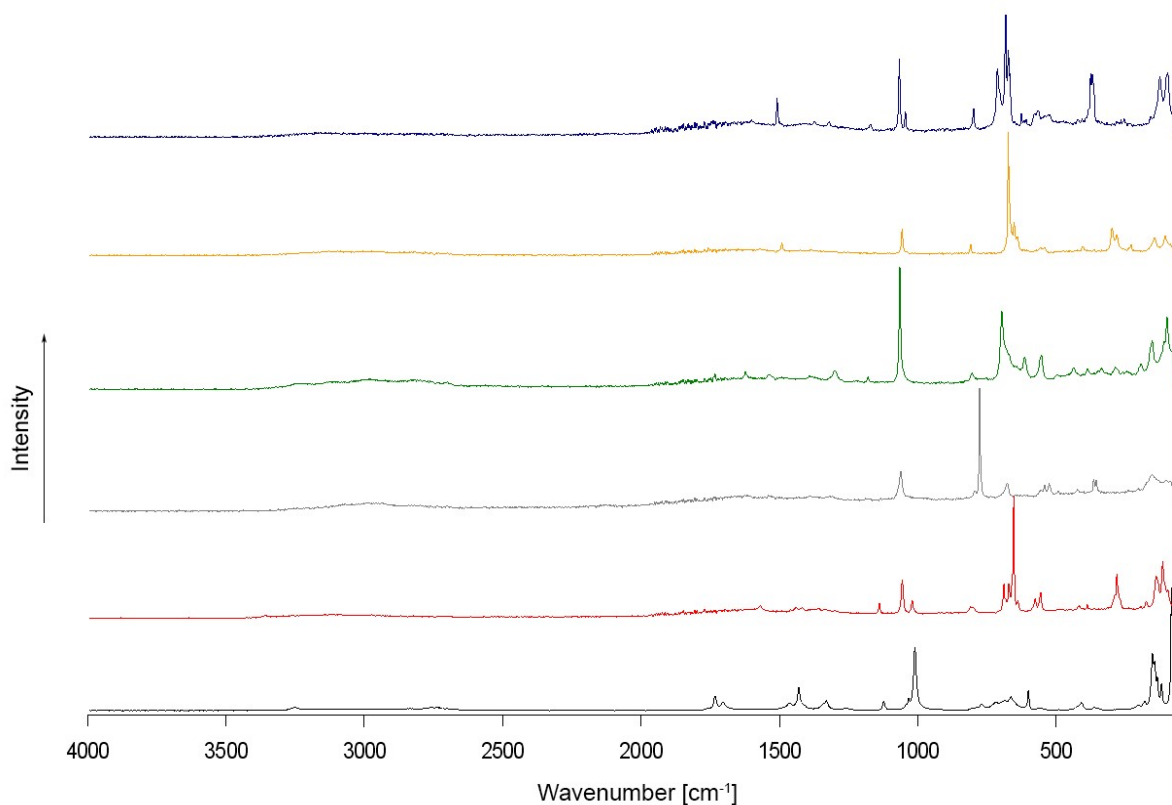

Figure 1: Raman spectra of urazole,  $[\text{C}_2\text{H}_3\text{N}_3\text{O}(\text{OH})][\text{SbF}_6]$ ,  $[\text{C}_2\text{H}_3\text{N}_3\text{O}(\text{OH})][\text{BF}_4]$ ,  $[\text{C}_2\text{H}_3\text{N}_3(\text{OH})_2][\text{Ge}_2\text{F}_{10}]$ ,  $[\text{C}_2\text{H}_3\text{N}_3(\text{OH})_2][(\text{SbF}_6)_2]$  and  $[\text{C}_2\text{H}_3\text{N}_3(\text{OH})_2][(\text{AsF}_6)_2]$ .

Table 1: Observed vibrational frequencies and calculated vibrational frequencies of urazole [ $\text{cm}^{-1}$ ] (calculated on B3LYP/6-311G++(3d2f, 3p2d) level of theory, Raman intensities in  $\text{\AA}^4/\text{u}$ ).

| exp. frequency (Intensity) | calc. frequency (Intensity) | assignment   |
|----------------------------|-----------------------------|--------------|
|                            | 3705(76)                    | $\nu$ (NH)   |
|                            | 3639(128)                   | $\nu$ (NH)   |
|                            | 3636(53)                    | $\nu$ (NH)   |
| 1733(12)                   | 1755(27)                    | $\nu_s$ (CO) |

|          |         |                                |
|----------|---------|--------------------------------|
| 1704(8)  | 1718(3) | $\nu_{as}$ (CO)                |
| 1464(6)  |         |                                |
| 1430(19) | 1430(6) | $\rho$ (NH)                    |
|          | 1405(5) | $\delta$ (NH)                  |
| 1331(8)  | 1337(5) | $\delta$ (NH)                  |
|          | 1331(7) | $\delta$ (NH)                  |
| 1258(2)  | 1205(6) | $\nu$ (CN)                     |
| 1123(8)  | 1104(2) | $\nu$ (NN)                     |
| 1043(5)  |         |                                |
| 1033(10) |         |                                |
| 1010(52) | 979(15) | ring breathing                 |
| 770(6)   | 749(2)  | $\delta$ (ring)                |
| 717(7)   |         |                                |
| 687(8)   | 704(2)  | $\delta$ (ring) (out of plane) |
| 664(11)  | 669(18) | $\tau$ (NH) + $\delta$ (ring)  |
| 601(17)  |         |                                |
| 558(2)   | 574(2)  | $\delta$ (NH)                  |
|          | 555(3)  | $\delta$ (NH)                  |
|          | 550(2)  | $\delta$ (NH)                  |
|          | 518(3)  | $\omega$ (NH)                  |
| 409(7)   |         |                                |
| 362(3)   | 382(2)  | $\delta$ (CO)                  |
| 354(2)   |         |                                |
| 205(4)   |         |                                |
| 180(8)   |         |                                |
| 152(47)  |         |                                |
| 145(40)  |         |                                |
| 134(27)  |         |                                |
| 119(22)  |         |                                |
| 83(100)  |         |                                |
| 71(12)   |         |                                |
| 56(3)    |         |                                |

Table 2: Observed vibrational frequencies and calculated vibrational frequencies of  $[C_2H_3N_3O(OH)][MF_y]$  [ $cm^{-1}$ ] (M= Sb, B;  $y= 6$  for Sb,  $y= 4$  for B)(calculated on B3LYP/6-311G++(3d2f, 3p2d) level of theory, Raman intensities in  $\text{\AA}^4/u$ ).

| exp. frequency<br>(Intensity)<br>[cation][SbF <sub>6</sub> ] | exp. frequency<br>(Intensity)<br>[cation][BF <sub>4</sub> ] | calc. frequency<br>(Intensity) | assignment                      |
|--------------------------------------------------------------|-------------------------------------------------------------|--------------------------------|---------------------------------|
|                                                              |                                                             | 3755(119)                      | $\nu$ (OH)                      |
|                                                              |                                                             | 3648(126)                      | $\nu$ (NH)                      |
|                                                              |                                                             | 3638(31)                       | $\nu$ (NH)                      |
|                                                              |                                                             | 3633(18)                       | $\nu$ (NH)                      |
|                                                              |                                                             | 1810(20)                       | $\nu$ (CO)                      |
|                                                              | 1625(14)                                                    | 1669(3)                        | $\nu$ (CO(H))                   |
| 1569(10)                                                     | 1541(13)                                                    | 1575(4)                        | $\nu$ (CN)                      |
| 1440(9)                                                      |                                                             | 1430(5)                        | $\rho$ (NH)                     |
| 1420(9)                                                      |                                                             |                                |                                 |
| 1357(9)                                                      | 1391(13)                                                    | 1378(4)                        | $\delta$ (NH)                   |
| 1332(7)                                                      | 1315(13)                                                    | 1320(2)                        | $\delta$ (NH)                   |
| 1296(6)                                                      |                                                             |                                |                                 |
| 1139(13)                                                     |                                                             | 1140(5)                        | $\nu$ (C-N)                     |
|                                                              |                                                             | 1120(4)                        | $\nu$ (NN)                      |
| 1056(31)                                                     | 1061(33)                                                    | 1085(11)                       | $\delta$ (OH)                   |
| 1021(15)                                                     |                                                             | 1032(15)                       | $\nu$ (C-N)                     |
|                                                              |                                                             | 930(3)                         | $\nu$ (C-N)                     |
| 809(10)                                                      |                                                             |                                |                                 |
| 800(9)                                                       | 793(17)                                                     | 760(3)                         | $\delta$ (CNN)                  |
|                                                              | <u>777(100)</u>                                             |                                |                                 |
| 689(28)                                                      |                                                             | 703(1)                         | $\delta$ (out-of-plane)         |
| 683(17)                                                      |                                                             |                                |                                 |
| 671(29)                                                      | 677(23)                                                     | 647(12)                        | ring breathing (CO)             |
| <u>654(100)</u>                                              |                                                             |                                |                                 |
| 638(15)                                                      |                                                             | 639(2)                         | $\delta$ (NH)                   |
|                                                              |                                                             | 633(2)                         | $\delta$ (NH) + $\delta$ (ring) |
| <u>576(16)</u>                                               |                                                             |                                |                                 |
| 555(22)                                                      | 559(17)                                                     | 534(5)                         | $\delta$ (CO + COH)             |
|                                                              | 542(22)                                                     |                                |                                 |
|                                                              | <u>526(23)</u>                                              |                                |                                 |
|                                                              | 493(17)                                                     | 475(3)                         | $\omega$ (NH + OH)              |

|                |                |        |                     |
|----------------|----------------|--------|---------------------|
| 419(11)        | 422(18)        |        |                     |
| 388(12)        | 365(26)        | 391(2) | $\tau$ (NH + OH)    |
|                | <u>355(26)</u> |        |                     |
|                |                | 350(2) | $\delta$ (CO + COH) |
|                |                | 320(1) | $\delta$ (OH + NN)  |
| 288(20)        |                | 290(1) | $\delta$ (OH)       |
| <u>281(36)</u> |                |        |                     |
|                | 240(18)        |        |                     |
| 194(10)        | 204(19)        |        |                     |
| 173(14)        |                |        |                     |
| 139(34)        |                |        |                     |
| 115(46)        |                |        |                     |
| 97(23)         |                |        |                     |
| 75(13)         |                |        |                     |

Table 3: Observed vibrational frequencies and calculated vibrational frequencies of  $[\text{C}_2\text{H}_3\text{N}_3(\text{OH})_2][\text{MF}_6]$  and  $[\text{C}_2\text{H}_3\text{N}_3(\text{OH})_2][\text{Ge}_2\text{F}_{10}]$  [ $\text{cm}^{-1}$ ] (M= Sb, As)(calculated on B3LYP/6-311G++(3d2f, 3p2d) level of theory, Raman intensities in  $\text{\AA}^4/\text{u}$ ).

| exp. frequency<br>(Intensity)<br>[cation][ $\text{Ge}_2\text{F}_{10}$ ] | exp. frequency<br>(Intensity)<br>[cation][ $\text{SbF}_6$ ][ $\text{Sb}_2\text{F}_{11}$ ] | exp. frequency<br>(Intensity)<br>[cation][ $\text{AsF}_6$ ] | calc.<br>frequency<br>(Intensity) | assignment                    |
|-------------------------------------------------------------------------|-------------------------------------------------------------------------------------------|-------------------------------------------------------------|-----------------------------------|-------------------------------|
|                                                                         |                                                                                           |                                                             | 3668(161)                         | $\nu$ (OH)                    |
|                                                                         |                                                                                           |                                                             | 3660(4)                           | $\nu$ (OH)                    |
|                                                                         |                                                                                           |                                                             | 3560(68)                          | $\nu$ (NH)                    |
|                                                                         |                                                                                           |                                                             | 3546(17)                          | $\nu$ (NH)                    |
|                                                                         |                                                                                           |                                                             | 3522(20)                          | $\nu$ (NH)                    |
| 1733(13)                                                                |                                                                                           |                                                             | 1719(1)                           | $\nu$ (CO)                    |
| 1623(15)                                                                |                                                                                           |                                                             |                                   |                               |
| 1535(12)                                                                | 1570(6)                                                                                   | 1508(32)                                                    | 1528(4)                           | $\nu$ (CN)                    |
|                                                                         | 1492(10)                                                                                  |                                                             | 1493(11)                          | $\delta$ (NH)                 |
| 1392(11)                                                                | 1381(5)                                                                                   | 1373(13)                                                    | 1382(3)                           | $\delta$ (NH)                 |
|                                                                         |                                                                                           |                                                             | 1366(1)                           | $\delta$ (NH)                 |
| 1300(16)                                                                |                                                                                           | 1320(13)                                                    | 1311(5)                           | $\nu$ (CN) +<br>$\delta$ (NH) |

|                |                     |                      |          |                           |
|----------------|---------------------|----------------------|----------|---------------------------|
| 1180(10)       |                     | 1170(11)             | 1139(2)  | $\nu$ (NN)                |
| 1065(100)      | 1057(22)<br>1039(4) | 1067(34)<br>1045(21) | 1044(23) | ring breathing (CN)       |
|                |                     |                      | 997(5)   | $\delta$ (OH)             |
|                |                     |                      | 992(3)   | $\nu$ (OH)                |
| 800(12)        | 809(9)              | 798(24)              | 765(3)   | $\delta$ (ring)           |
|                |                     | 713(56)              |          |                           |
| <u>697(64)</u> | <u>673(100)</u>     |                      |          |                           |
|                | <u>652(27)</u>      | <u>682(100)</u>      |          |                           |
| 672(29)        |                     | 673(71)<br>667(52)   | 666(16)  | $\delta$ (2x COH, ring)   |
|                | 639(15)             | 626(20)              |          |                           |
| 614(27)        | 616(5)              | 616(14)              |          |                           |
|                |                     | 609(15)              |          |                           |
|                |                     | <u>579(20)</u>       |          |                           |
| 553(28)        | 557(7)              | 565(22)              |          |                           |
|                | 541(7)              | 530(19)              | 523(4)   | $\delta$ (OH + NH)        |
| 437(18)        |                     | 422(15)              |          |                           |
|                | 404(7)              | 407(15)              | 404(2)   | $\omega + \tau$ (OH + NH) |
|                |                     | 392(16)              |          |                           |
| 387(17)        |                     | 383(24)              | 348(1)   | $\delta$ (COH)            |
|                |                     | 375(52)              |          |                           |
|                |                     | 370(52)              |          |                           |
| <u>337(18)</u> | <u>298(23)</u>      |                      |          |                           |
| <u>287(18)</u> | <u>281(17)</u>      | <u>281(14)</u>       |          |                           |
|                | <u>230(9)</u>       |                      |          |                           |
|                |                     | 254(15)              |          |                           |
| 192(21)        |                     |                      |          |                           |
| 153(40)        | 145(15)             | 159(17)              |          |                           |
| 110(39)        | 106(16)             | 126(49)              |          |                           |
| 100(60)        |                     | 98(52)               |          |                           |
| 84(32)         | 87(10)              |                      |          |                           |



### 3. Crystal structures

#### 3.1 $[C_2N_3H_3O(OH)][SbF_6]$

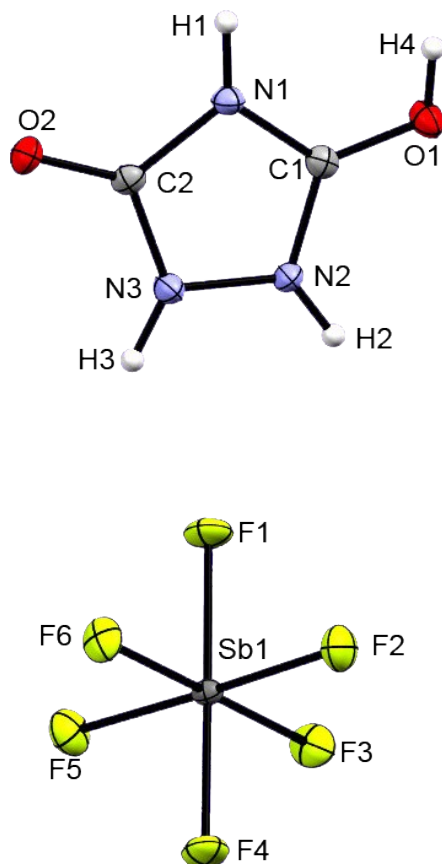

Figure 2: Asymmetric unit of  $[C_2N_3H_3O(OH)][SbF_6]$ , view along  $a$ , displacement ellipsoids at 50% probability.

Monoprotonated Urazole crystallizes as  $[C_2N_3H_3O(OH)][SbF_6]$  in the monoclinic space group  $P2_1/c$ . A unit cell contains 4 formula units.

Table 4: Bond lengths ( $\text{\AA}$ ) of  $[C_2N_3H_3O(OH)][SbF_6]$ .

|     |    |            |
|-----|----|------------|
| Sb1 | F3 | 1.8702(15) |
| Sb1 | F5 | 1.8721(14) |
| Sb1 | F2 | 1.8736(14) |
| Sb1 | F4 | 1.8782(15) |
| Sb1 | F1 | 1.8801(15) |
| Sb1 | F6 | 1.8841(14) |
| O2  | C2 | 1.233(3)   |
| O1  | C1 | 1.284(3)   |
| N1  | C1 | 1.347(3)   |
| N1  | C2 | 1.389(3)   |

|    |    |          |
|----|----|----------|
| N3 | C2 | 1.342(3) |
| N3 | N2 | 1.380(3) |
| N2 | C1 | 1.315(3) |



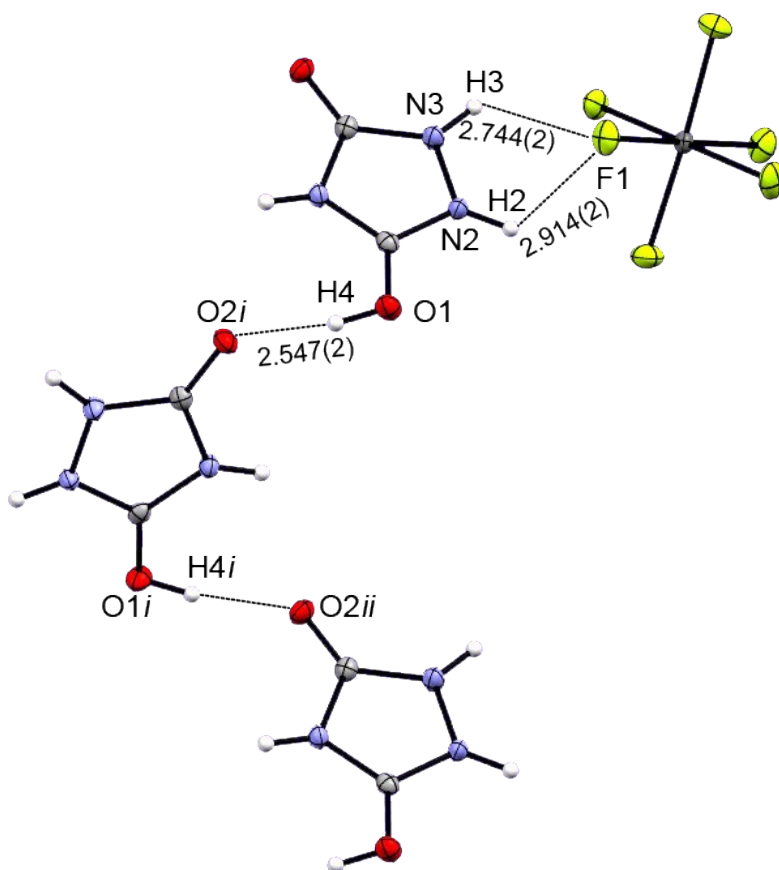

Figure 3: Cation-cation contacts in  $[\text{C}_2\text{N}_3\text{H}_3\text{O}(\text{OH})][\text{SbF}_6]$ , view along  $c$ , displacement ellipsoids at 50% probability.

Table 5: Particular H-bond lengths (Å) for  $[\text{C}_2\text{N}_3\text{H}_3\text{O}(\text{OH})][\text{SbF}_6]$ .

|    |               |          |
|----|---------------|----------|
| O2 | O1' (via H4') | 2.547(2) |
|----|---------------|----------|

The cations are connected by hydrogen bonds between the protonated carbonyl group to the unprotonated carbonyl group of another cation, leading to endless zig-zag-chains.

Table 6: Data collection and structure refinement for  $[\text{C}_2\text{N}_3\text{H}_3\text{O}(\text{OH})][\text{SbF}_6]$ .

|                         | $[\text{C}_2\text{N}_3\text{H}_3\text{O}(\text{OH})][\text{SbF}_6]$ |
|-------------------------|---------------------------------------------------------------------|
| <b>Chemical formula</b> | $\text{C}_2 \text{H}_4 \text{F}_6 \text{N}_3 \text{O}_2 \text{Sb}$  |
| <b>Formula weight</b>   | 337.84 g/mol                                                        |
| <b>Temperature</b>      | 110(2) K                                                            |
| <b>Wavelength</b>       | 0.71073 Å                                                           |
| <b>Crystal size</b>     | 0.195 x 0.141 x 0.106 mm                                            |
| <b>Crystal habit</b>    | colorless block                                                     |
| <b>Crystal system</b>   | monoclinic                                                          |
| <b>Space group</b>      | $P 2_1/c$                                                           |

|                                         |                                                                                                              |                             |
|-----------------------------------------|--------------------------------------------------------------------------------------------------------------|-----------------------------|
| <b>Unit cell dimensions</b>             | a = 10.5271(9) Å                                                                                             | $\alpha = 90^\circ$         |
|                                         | b = 8.3036(4) Å                                                                                              | $\beta = 118.384(11)^\circ$ |
|                                         | c = 10.5808(9) Å                                                                                             | $\gamma = 90^\circ$         |
| <b>Volume</b>                           | 813.71(14) Å <sup>3</sup>                                                                                    |                             |
| <b>Z</b>                                | 4                                                                                                            |                             |
| <b>Density (calculated)</b>             | 2.758 g/cm <sup>3</sup>                                                                                      |                             |
| <b>Absorption coefficient</b>           | 3.480 mm <sup>-1</sup>                                                                                       |                             |
| <b>F(000)</b>                           | 632                                                                                                          |                             |
| <b>Diffractometer</b>                   | Oxford XCalibur                                                                                              |                             |
| <b>Radiation source</b>                 | MoK $\alpha$ , $\lambda = 0.71073$ Å                                                                         |                             |
| <b>Index ranges</b>                     | -13 $\leq$ h $\leq$ 15, -12 $\leq$ k $\leq$ 7, -15 $\leq$ l $\leq$ 13                                        |                             |
| <b>Reflections collected</b>            | 2706                                                                                                         |                             |
| <b>Absorption correction</b>            | multi-scan                                                                                                   |                             |
| <b>Max. and min. transmission</b>       | 1.000 and 0.797                                                                                              |                             |
| <b>Structure solution program</b>       | SHELXT 2018/3 (Sheldrick, 2018)                                                                              |                             |
| <b>Refinement method</b>                | Full-matrix least-squares on F <sup>2</sup>                                                                  |                             |
| <b>Refinement program</b>               | SHELXL-2018/3 (Sheldrick, 2018)                                                                              |                             |
| <b>Goodness-of-fit on F<sup>2</sup></b> | 1.043                                                                                                        |                             |
| <b>Final R indices</b>                  | 2378 data; $l > 2 \sigma(l)$                                                                                 | R1 = 0.0233, wR2 = 0.0515   |
|                                         | all data                                                                                                     | R1 = 0.0295                 |
| <b>Weighting scheme</b>                 | w=1/[ $\sigma_s^2 + (0.0204P)^2$ ] where<br>P=(F <sub>o</sub> <sup>2</sup> +2F <sub>c</sub> <sup>2</sup> )/3 |                             |
| <b>Largest diff. peak and hole</b>      | 1.162 and -0.731 eÅ <sup>-3</sup>                                                                            |                             |
| <b>R.M.S. deviation from mean</b>       | 0.137 eÅ <sup>-3</sup>                                                                                       |                             |
| <b>CCDC-deposition number</b>           | 2072534                                                                                                      |                             |

Table 7: Bond angles (°) for [C<sub>2</sub>N<sub>3</sub>H<sub>3</sub>O(OH)][SbF<sub>6</sub>].

|    |     |    |           |
|----|-----|----|-----------|
| F3 | Sb1 | F5 | 90.77(7)  |
| F3 | Sb1 | F2 | 92.59(7)  |
| F5 | Sb1 | F2 | 176.64(7) |
| F3 | Sb1 | F4 | 90.03(7)  |
| F5 | Sb1 | F4 | 89.14(6)  |
| F2 | Sb1 | F4 | 90.94(7)  |
| F3 | Sb1 | F1 | 89.67(7)  |
| F5 | Sb1 | F1 | 90.09(6)  |

|    |     |    |                |
|----|-----|----|----------------|
| F2 | Sb1 | F1 | 89.84(7)       |
| F4 | Sb1 | F1 | 179.18(7)      |
| F3 | Sb1 | F6 | 179.23(7)      |
| F5 | Sb1 | F6 | 89.62(7)       |
| F2 | Sb1 | F6 | 87.02(7)       |
| F4 | Sb1 | F6 | 89.31(7)       |
| F1 | Sb1 | F6 | 91.00(7)       |
| C1 | N1  | C2 | 109.50(19<br>) |
| C2 | N3  | N2 | 109.71(19<br>) |
| C1 | N2  | N3 | 107.82(19<br>) |
| O2 | C2  | N3 | 127.5(2)       |
| O2 | C2  | N1 | 127.9(2)       |
| N3 | C2  | N1 | 104.61(19<br>) |
| O1 | C1  | N2 | 123.8(2)       |
| O1 | C1  | N1 | 127.8(2)       |
| N2 | C1  | N1 | 108.32(19<br>) |

Table 8: Anisotropic atomic displacement parameters ( $\text{\AA}^2$ ) for  $[\text{C}_2\text{N}_3\text{H}_3\text{O}(\text{OH})][\text{SbF}_6]$ .

|     | $U_{11}$       | $U_{22}$       | $U_{33}$       | $U_{23}$    | $U_{13}$   | $U_{12}$    |
|-----|----------------|----------------|----------------|-------------|------------|-------------|
| Sb1 | 0.00913(8<br>) | 0.01250(8<br>) | 0.01016(8<br>) | -0.00045(5) | 0.00441(6) | -0.00041(5) |
| F4  | 0.0210(8)      | 0.0303(8)      | 0.0101(7)      | -0.0003(6)  | 0.0022(6)  | -0.0043(6)  |
| F5  | 0.0278(8)      | 0.0164(7)      | 0.0259(8)      | -0.0001(6)  | 0.0143(7)  | 0.0058(6)   |
| F1  | 0.0187(8)      | 0.0309(8)      | 0.0102(7)      | -0.0002(6)  | 0.0016(6)  | -0.0007(6)  |
| F6  | 0.0170(7)      | 0.0227(7)      | 0.0285(8)      | 0.0030(6)   | 0.0165(7)  | -0.0005(6)  |
| F2  | 0.0279(9)      | 0.0139(7)      | 0.0277(8)      | -0.0013(6)  | 0.0120(7)  | 0.0010(6)   |
| F3  | 0.0170(7)      | 0.0349(9)      | 0.0280(8)      | 0.0084(7)   | 0.0143(7)  | -0.0018(6)  |
| O2  | 0.0152(8)      | 0.0163(8)      | 0.0193(9)      | 0.0003(6)   | 0.0086(7)  | -0.0037(6)  |
| O1  | 0.0171(9)      | 0.0170(8)      | 0.0195(9)      | 0.0057(7)   | 0.0102(8)  | 0.0021(7)   |
| N1  | 0.0098(9)      | 0.0150(9)      | 0.0126(9)      | 0.0014(7)   | 0.0038(8)  | 0.0008(7)   |
| N3  | 0.0122(10)     | 0.0155(10)     | 0.0154(10)     | 0.0043(7)   | 0.0052(8)  | 0.0001(7)   |

|    |            |            |            |            |           |            |
|----|------------|------------|------------|------------|-----------|------------|
|    | )          | )          | )          |            |           |            |
| N2 | 0.0103(9)  | 0.0128(9)  | 0.0143(9)  | 0.0016(7)  | 0.0044(8) | -0.0012(7) |
| C2 | 0.0132(11) | 0.0148(10) | 0.0109(10) | -0.0014(8) | 0.0061(9) | -0.0008(8) |
|    | )          | )          | )          |            |           |            |
| C1 | 0.0137(11) | 0.0125(9)  | 0.0124(10) | -0.0011(8) | 0.0066(9) | 0.0017(8)  |
|    | )          |            | )          |            |           |            |

### 3.2 $[C_2N_3H_3(OH)_2][Ge_2F_{10}]$

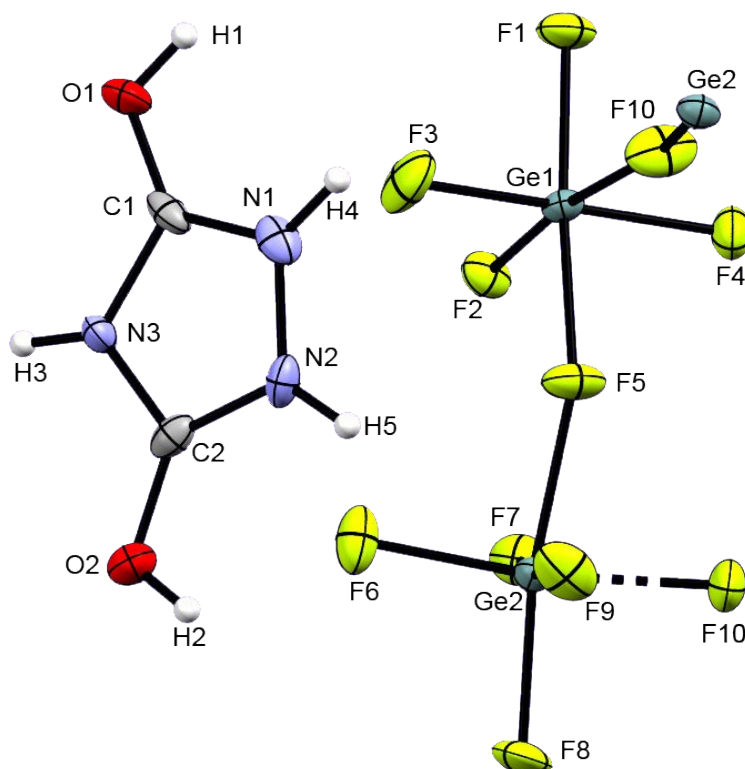

Figure 4: Asymmetric unit of  $[C_2N_3H_3(OH)_2][Ge_2F_{10}]$ , view along  $a$ , displacement ellipsoids at 50% probability.

Diprotonated Urazole crystallizes as  $[C_2N_3H_3(OH)_2][Ge_2F_{10}]$  in the monoclinic space group  $P2_1/n$ . A unit cell contains 4 formula units.

Table 9: Bond lengths (Å) of  $[C_2N_3H_3(OH)_2][Ge_2F_{10}]$ .

|     |    |          |
|-----|----|----------|
| Ge1 | F3 | 1.714(3) |
| Ge1 | F2 | 1.743(3) |
| Ge1 | F4 | 1.757(3) |
| Ge1 | F1 | 1.774(3) |
| Ge1 | F5 | 1.870(3) |

|     |     |          |
|-----|-----|----------|
| Ge1 | F10 | 1.910(4) |
| Ge2 | F6  | 1.730(4) |
| Ge2 | F9  | 1.736(4) |
| Ge2 | F7  | 1.755(3) |
| Ge2 | F8  | 1.762(3) |
| Ge2 | F10 | 1.893(3) |
| Ge2 | F5  | 1.895(3) |
| O1  | C1  | 1.277(7) |
| O1  | H1  | 0.8200   |
| O2  | C2  | 1.289(7) |
| O2  | H2  | 0.8201   |
| N1  | C1  | 1.313(8) |
| N1  | N2  | 1.370(7) |
| N1  | H4  | 0.8601   |
| N2  | C2  | 1.301(8) |
| N2  | H5  | 0.8599   |
| N3  | C2  | 1.349(7) |
| N3  | C1  | 1.360(7) |
| N3  | H3  | 0.8600   |

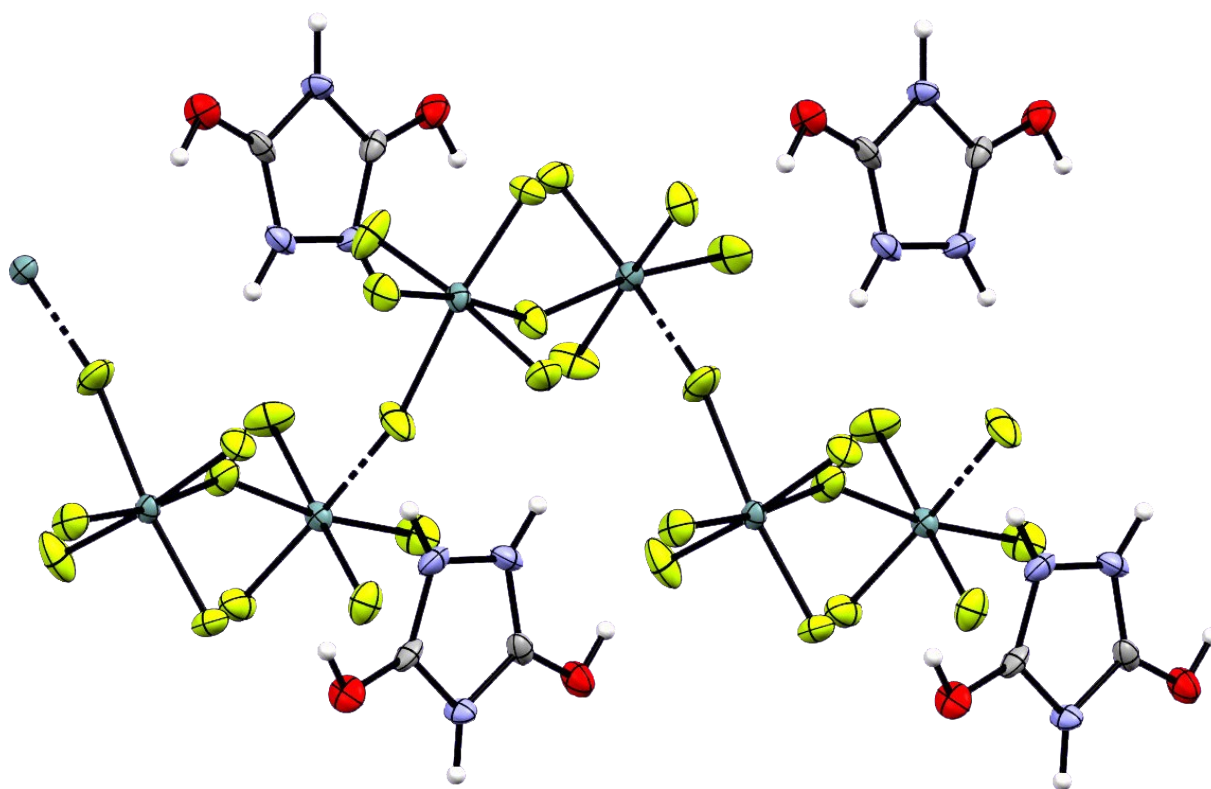

Figure 5: Packing of  $[\text{C}_2\text{N}_3\text{H}_3(\text{OH})_2][\text{Ge}_2\text{F}_{10}]$ , view along  $c$ , displacement ellipsoids at 50% probability.

The cations are arranged around the infinite  $\text{Ge}_2\text{F}_{10}$  anion chain.

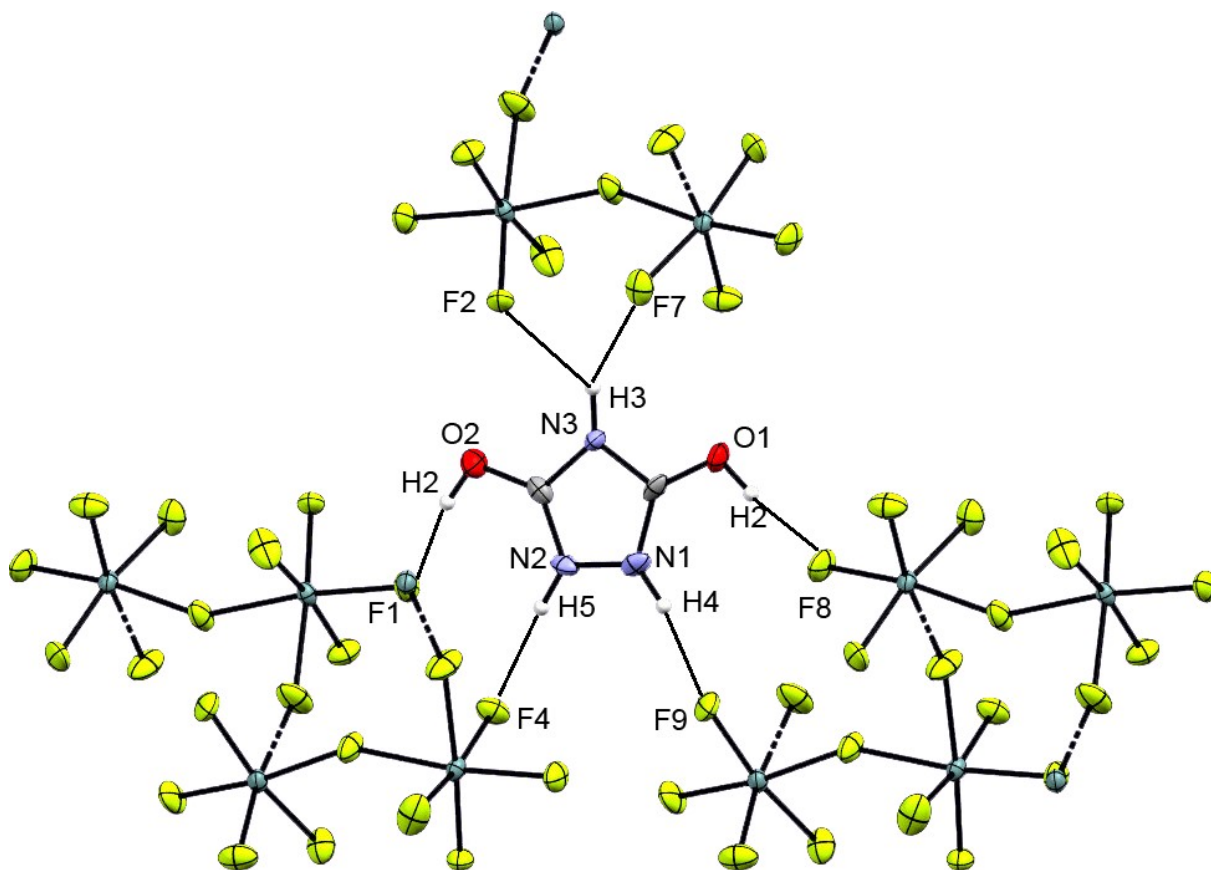

Figure 6: Particular hydrogen bonds of  $[\text{C}_2\text{N}_3\text{H}_3(\text{OH})_2][\text{Ge}_2\text{F}_{10}]$ , view along  $a$ , displacement ellipsoids at 50% probability.

Table 10: Particular H-bond lengths (Å) for  $[\text{C}_2\text{N}_3\text{H}_3(\text{OH})_2][\text{Ge}_2\text{F}_{10}]$ .

|             |    |          |
|-------------|----|----------|
| O2 (via H2) | F1 | 2.519(6) |
| O1 (via H1) | F8 | 2.531(6) |
| N2 (via H5) | F4 | 2.673(7) |
| N1 (via H4) | F9 | 2.616(7) |
| N3 (via H3) | F2 | 2.763(6) |
| N3 (via H3) | F7 | 2.976(6) |

Compared to the monoprotonated species, no contacts between the cations can be detected. Each hydrogen atom exhibits strong to moderate hydrogen bonds to various  $[\text{Ge}_2\text{F}_{10}]$  chains.



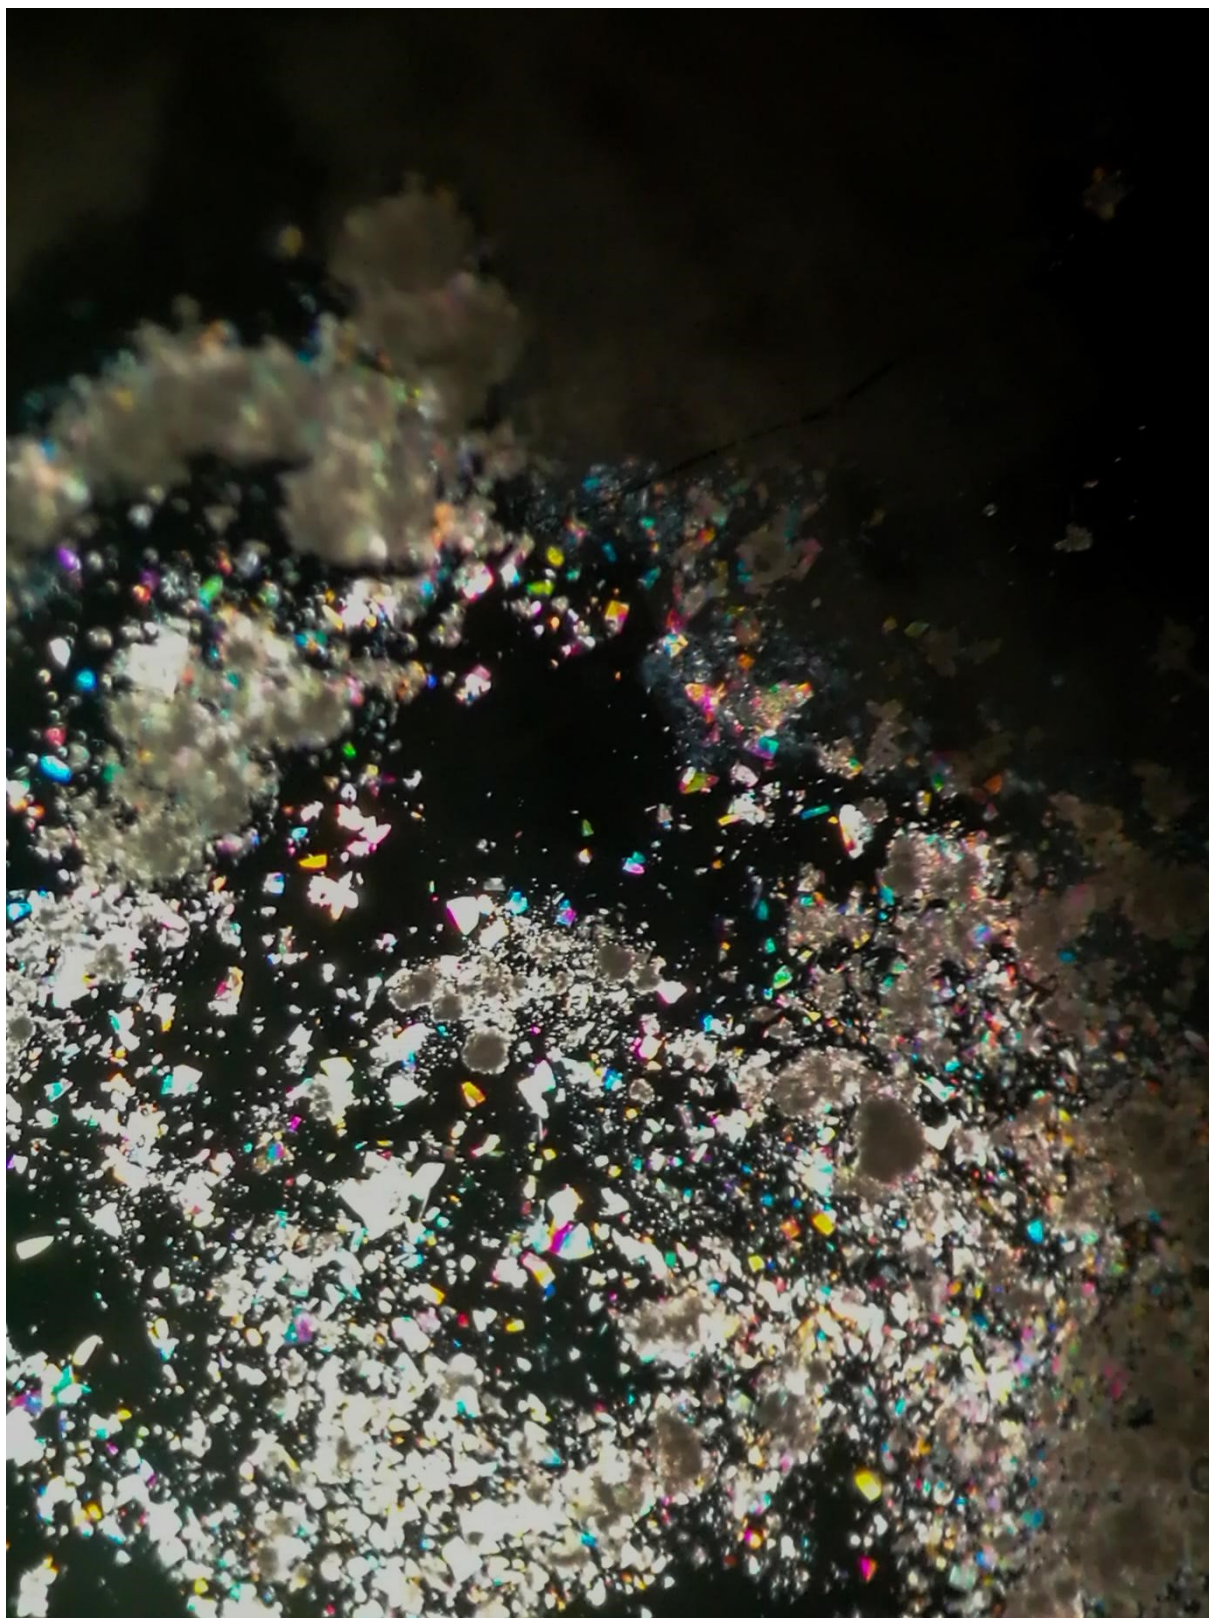

Image 1: Crystals of  $[\text{C}_2\text{N}_3\text{H}_3(\text{OH})_2][\text{Ge}_2\text{F}_{10}]$  under the microscope.

Table 11: Data collection and structure refinement for  $[\text{C}_2\text{N}_3\text{H}_3(\text{OH})_2][\text{Ge}_2\text{F}_{10}]$ .

|                                            |                                                                               |                                |
|--------------------------------------------|-------------------------------------------------------------------------------|--------------------------------|
|                                            | $[\text{C}_2\text{N}_3\text{H}_3(\text{OH})_2][\text{Ge}_2\text{F}_{10}]$     |                                |
| <b>Chemical formula</b>                    | $\text{C}_2 \text{H}_5 \text{F}_{10} \text{Ge}_2 \text{N}_3 \text{O}_2$       |                                |
| <b>Formula weight</b>                      | 438.31 g/mol                                                                  |                                |
| <b>Temperature</b>                         | 101(2) K                                                                      |                                |
| <b>Wavelength</b>                          | 0.71073 Å                                                                     |                                |
| <b>Crystal size</b>                        | 0.395 x 0.268 x 0.212 mm                                                      |                                |
| <b>Crystal habit</b>                       | colorless plate                                                               |                                |
| <b>Crystal system</b>                      | monoclinic                                                                    |                                |
| <b>Space group</b>                         | $P 2_1/n$                                                                     |                                |
| <b>Unit cell dimensions</b>                | $a = 7.8994(10) \text{ \AA}$                                                  | $\alpha = 90^\circ$            |
|                                            | $b = 18.299(3) \text{ \AA}$                                                   | $\beta = 114.751(16)^\circ$    |
|                                            | $c = 8.1991(11) \text{ \AA}$                                                  | $\gamma = 90^\circ$            |
| <b>Volume</b>                              | $1076.3(3) \text{ \AA}^3$                                                     |                                |
| <b>Z</b>                                   | 4                                                                             |                                |
| <b>Density (calculated)</b>                | $2.705 \text{ g/cm}^3$                                                        |                                |
| <b>Absorption coefficient</b>              | $5.733 \text{ mm}^{-1}$                                                       |                                |
| <b>F(000)</b>                              | 832                                                                           |                                |
| <b>Diffractometer</b>                      | Oxford XCalibur                                                               |                                |
| <b>Radiation source</b>                    | $\text{MoK}\alpha$ , $\lambda = 0.71073 \text{ \AA}$                          |                                |
| <b>Index ranges</b>                        | $-9 \leq h \leq 8$ , $-22 \leq k \leq 19$ , $-9 \leq l \leq 10$               |                                |
| <b>Reflections collected</b>               | 2194                                                                          |                                |
| <b>Absorption correction</b>               | multi-scan                                                                    |                                |
| <b>Max. and min. transmission</b>          | 1.000 and 0.765                                                               |                                |
| <b>Structure solution program</b>          | SHELXT 2018/3 (Sheldrick, 2018)                                               |                                |
| <b>Refinement method</b>                   | Full-matrix least-squares on $F^2$                                            |                                |
| <b>Refinement program</b>                  | SHELXL-2018/3 (Sheldrick, 2018)                                               |                                |
| <b>Goodness-of-fit on <math>F^2</math></b> | 1.030                                                                         |                                |
| <b>Final R indices</b>                     | $1731 \text{ data; } l > 2 \sigma(l)$                                         | $R1 = 0.0471$ , $wR2 = 0.1183$ |
|                                            | all data                                                                      | $R1 = 0.0640$                  |
| <b>Weighting scheme</b>                    | $w = 1 / [\sigma_s^2 (F_o^2) + (0.0538P)^2]$ where $P = (F_o^2 + 2F_c^2) / 3$ |                                |
| <b>Largest diff. peak and hole</b>         | $1.334$ and $-0.954 \text{ e\AA}^{-3}$                                        |                                |
| <b>R.M.S. deviation from mean</b>          | $0.190 \text{ e\AA}^{-3}$                                                     |                                |
| <b>CCDC-deposition number</b>              | 2072535                                                                       |                                |



Table 12: Bond angles (°) for [C<sub>2</sub>N<sub>3</sub>H<sub>3</sub>(OH)<sub>2</sub>][Ge<sub>2</sub>F<sub>10</sub>].

|     |     |     |            |
|-----|-----|-----|------------|
| F3  | Ge1 | F2  | 94.42(18)  |
| F3  | Ge1 | F4  | 172.38(19) |
| F2  | Ge1 | F4  | 92.33(16)  |
| F3  | Ge1 | F1  | 92.19(17)  |
| F2  | Ge1 | F1  | 95.98(16)  |
| F4  | Ge1 | F1  | 90.60(16)  |
| F3  | Ge1 | F5  | 88.07(17)  |
| F2  | Ge1 | F5  | 91.63(16)  |
| F4  | Ge1 | F5  | 88.22(16)  |
| F1  | Ge1 | F5  | 172.34(17) |
| F3  | Ge1 | F10 | 89.71(19)  |
| F2  | Ge1 | F10 | 172.80(15) |
| F4  | Ge1 | F10 | 83.22(16)  |
| F1  | Ge1 | F10 | 89.74(16)  |
| F5  | Ge1 | F10 | 82.61(16)  |
| F6  | Ge2 | F9  | 94.02(17)  |
| F6  | Ge2 | F7  | 91.07(17)  |
| F9  | Ge2 | F7  | 171.41(18) |
| F6  | Ge2 | F8  | 97.85(18)  |
| F9  | Ge2 | F8  | 92.31(18)  |
| F7  | Ge2 | F8  | 93.85(17)  |
| F6  | Ge2 | F10 | 171.55(17) |
| F9  | Ge2 | F10 | 88.82(18)  |
| F7  | Ge2 | F10 | 85.20(18)  |
| F8  | Ge2 | F10 | 89.98(17)  |
| F6  | Ge2 | F5  | 90.57(17)  |
| F9  | Ge2 | F5  | 84.63(16)  |
| F7  | Ge2 | F5  | 88.41(15)  |
| F8  | Ge2 | F5  | 171.24(18) |
| F10 | Ge2 | F5  | 81.77(15)  |

|     |     |     |          |
|-----|-----|-----|----------|
| Ge1 | F5  | Ge2 | 149.0(2) |
| Ge2 | F10 | Ge1 | 160.5(2) |
| C1  | O1  | H1  | 110.2    |
| C2  | O2  | H2  | 108.6    |
| C1  | N1  | N2  | 108.2(5) |
| C1  | N1  | H4  | 125.6    |
| N2  | N1  | H4  | 126.3    |
| C2  | N2  | N1  | 108.2(5) |
| C2  | N2  | H5  | 125.8    |
| N1  | N2  | H5  | 126.0    |
| C2  | N3  | C1  | 107.7(6) |
| C2  | N3  | H3  | 126.6    |
| C1  | N3  | H3  | 125.7    |
| O1  | C1  | N1  | 130.1(6) |
| O1  | C1  | N3  | 122.4(6) |
| N1  | C1  | N3  | 107.5(5) |
| O2  | C2  | N2  | 129.1(6) |
| O2  | C2  | N3  | 122.5(6) |
| N2  | C2  | N3  | 108.4(5) |

Table 13: Anisotropic atomic displacement parameters ( $\text{\AA}^2$ ) for  $[\text{C}_2\text{N}_3\text{H}_3(\text{OH})_2][\text{Ge}_2\text{F}_{10}]$ .

|     | $U_{11}$   | $U_{22}$  | $U_{33}$   | $U_{23}$    | $U_{13}$   | $U_{12}$    |
|-----|------------|-----------|------------|-------------|------------|-------------|
| Ge1 | 0.0129(3)  | 0.0165(4) | 0.0104(3)  | -0.0017(3)  | 0.0035(2)  | 0.0005(2)   |
| Ge2 | 0.0163(3)  | 0.0162(4) | 0.0114(3)  | -0.0001(3)  | 0.0060(2)  | -0.0022(2)  |
| F1  | 0.0324(19) | 0.027(2)  | 0.0118(16) | -0.0001(16) | 0.0029(14) | 0.0037(16)  |
| F2  | 0.0279(18) | 0.015(2)  | 0.0208(17) | 0.0016(15)  | 0.0103(14) | 0.0053(15)  |
| F3  | 0.0235(18) | 0.049(3)  | 0.036(2)   | -0.015(2)   | 0.0166(16) | -0.0181(19) |
| F4  | 0.0235(17) | 0.021(2)  | 0.0304(19) | 0.0031(17)  | 0.0099(14) | -0.0050(16) |
| F5  | 0.0293(17) | 0.027(2)  | 0.0130(17) | -0.0027(15) | 0.0026(13) | 0.0087(17)  |
| F6  | 0.0223(17) | 0.020(2)  | 0.048(2)   | -0.0019(19) | 0.0183(16) | -0.0027(16) |

|     |                |          |                |             |            |            |
|-----|----------------|----------|----------------|-------------|------------|------------|
| F7  | 0.0196(17<br>) | 0.037(3) | 0.0252(18<br>) | 0.0023(18)  | 0.0123(14) | 0.0062(17) |
| F8  | 0.051(2)       | 0.030(2) | 0.0114(17<br>) | 0.0067(17)  | 0.0021(16) | -0.002(2)  |
| F9  | 0.047(2)       | 0.026(2) | 0.0272(19<br>) | -0.0018(18) | 0.0252(16) | 0.0087(19) |
| F10 | 0.0302(19<br>) | 0.028(2) | 0.030(2)       | -0.0049(18) | 0.0048(15) | 0.0156(18) |
| O1  | 0.030(2)       | 0.026(3) | 0.0123(19<br>) | 0.0049(19)  | 0.0068(16) | -0.001(2)  |
| O2  | 0.025(2)       | 0.025(3) | 0.017(2)       | -0.003(2)   | 0.0045(16) | -0.005(2)  |
| N1  | 0.017(2)       | 0.018(3) | 0.027(3)       | 0.007(2)    | 0.011(2)   | 0.007(2)   |
| N2  | 0.020(2)       | 0.013(3) | 0.026(3)       | -0.005(2)   | 0.012(2)   | -0.005(2)  |
| N3  | 0.022(2)       | 0.013(3) | 0.014(2)       | 0.003(2)    | 0.0072(19) | -0.001(2)  |
| C1  | 0.016(3)       | 0.020(4) | 0.020(3)       | 0.011(3)    | 0.009(2)   | 0.007(3)   |
| C2  | 0.013(3)       | 0.021(4) | 0.019(3)       | -0.007(3)   | 0.007(2)   | -0.002(2)  |

### 3.3 $[C_2N_3H_3(OH)_2][(AsF_6)_2]$

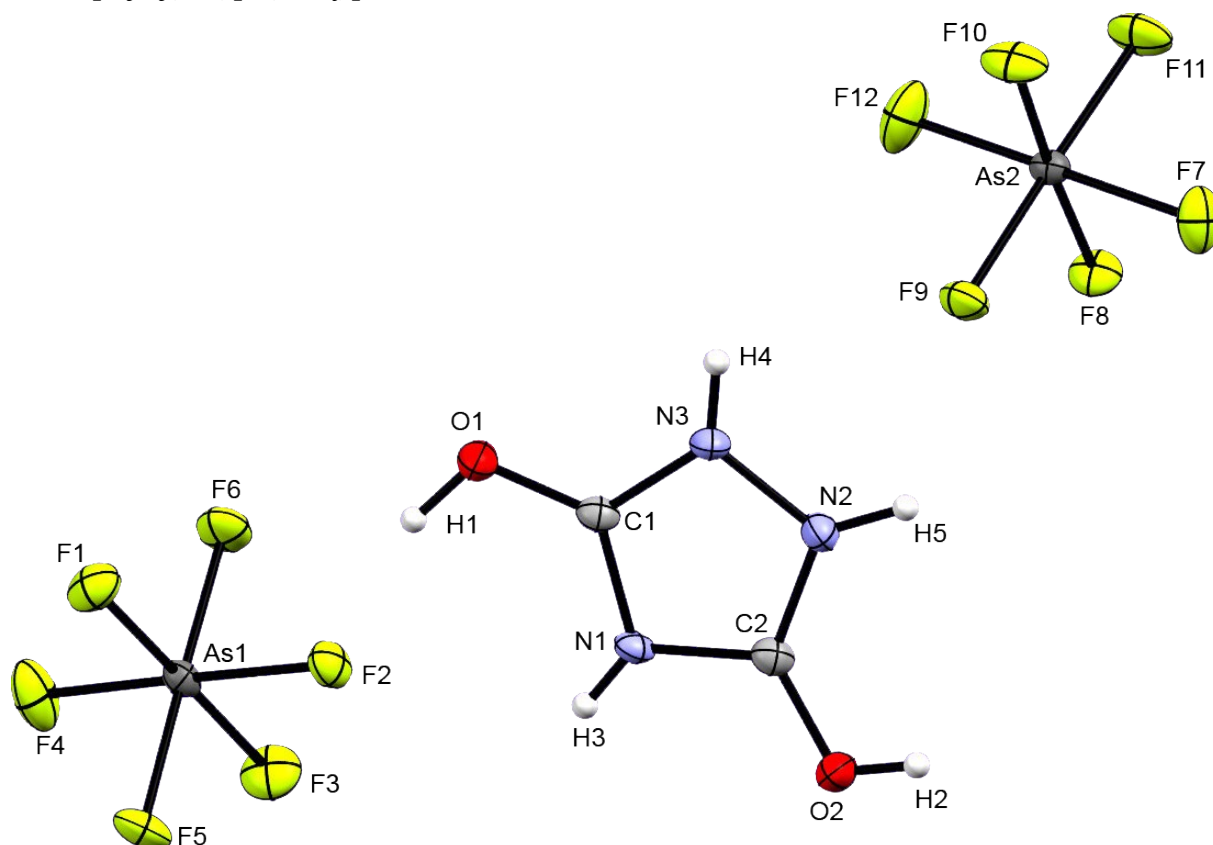

Figure 7: Asymmetric unit of  $[C_2N_3H_3(OH)_2][(AsF_6)_2]$ , view along  $a$ , displacement ellipsoids at 50% probability.

Diprotonated Urazole crystallizes as  $[C_2N_3H_3(OH)_2][(AsF_6)_2]$  in the orthorhombic space group  $Pbca$ . A unit cell contains 8 formula units.

Table 14: Bond lengths (Å) of  $[C_2N_3H_3(OH)_2][(AsF_6)_2]$ .

|     |     |            |
|-----|-----|------------|
| As1 | F6  | 1.7074(16) |
| As1 | F3  | 1.7074(18) |
| As1 | F4  | 1.7084(19) |
| As1 | F1  | 1.7165(17) |
| As1 | F5  | 1.7355(16) |
| As1 | F2  | 1.7444(17) |
| As2 | F12 | 1.695(2)   |
| As2 | F10 | 1.7151(16) |
| As2 | F9  | 1.7189(16) |
| As2 | F8  | 1.7229(16) |
| As2 | F11 | 1.7270(17) |

|     |    |            |
|-----|----|------------|
| As2 | F7 | 1.7368(19) |
| O1  | C1 | 1.279(4)   |
| O2  | C2 | 1.283(3)   |
| N1  | C2 | 1.354(4)   |
| N1  | C1 | 1.355(3)   |
| N3  | C1 | 1.308(4)   |
| N3  | N2 | 1.372(3)   |
| N2  | C2 | 1.316(3)   |

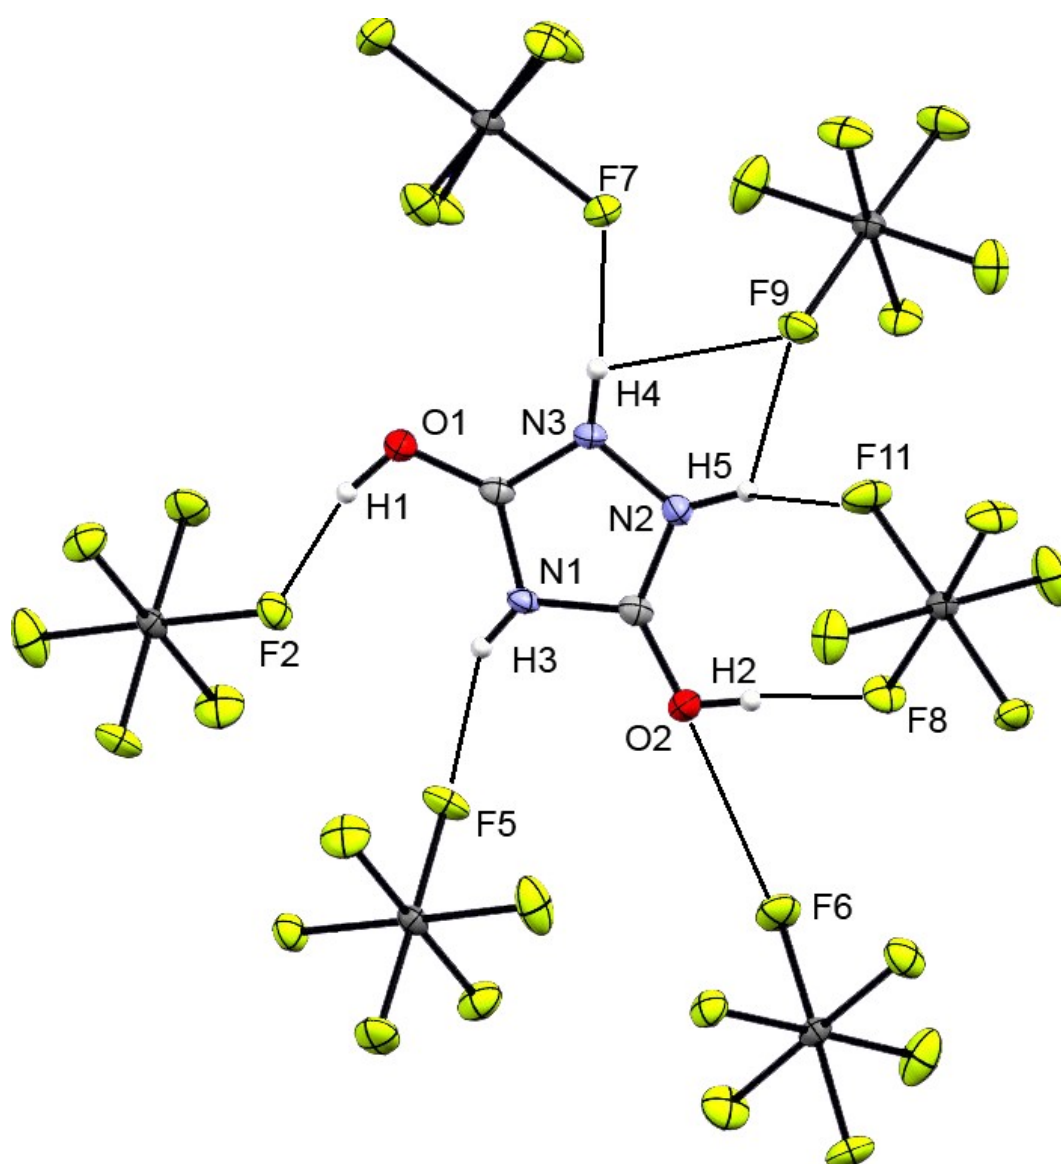

Figure 8: Particular hydrogen bonds of  $[C_2N_3H_3(OH)_2][(AsF_6)_2]$ , view along  $c$ , displacement ellipsoids at 50% probability.

Table 15: Particular H-bond lengths (Å) for  $[C_2N_3H_3(OH)_2][(AsF_6)_2]$ .

|             |     |          |
|-------------|-----|----------|
| O1 (via H1) | F2  | 2.583(3) |
| O2 (via H2) | F6  | 2.791(3) |
| O2 (via H2) | F8  | 2.721(3) |
| N1 (via H3) | F5  | 2.722(3) |
| N2 (via H5) | F9  | 2.858(3) |
| N2 (via H5) | F11 | 2.768(3) |
| N3 (via H4) | F7  | 2.727(3) |
| N3 (via H4) | F9  | 2.858(3) |

Table 16: Data collection and structure refinement for  $[\text{C}_2\text{N}_3\text{H}_3(\text{OH})_2][(\text{AsF}_6)_2]$ .

|                                   |                                                                         | $[\text{C}_2\text{N}_3\text{H}_3(\text{OH})_2][(\text{AsF}_6)_2]$ |
|-----------------------------------|-------------------------------------------------------------------------|-------------------------------------------------------------------|
| <b>Chemical formula</b>           | $\text{C}_2 \text{H}_5 \text{As}_2 \text{F}_{12} \text{N}_3 \text{O}_2$ |                                                                   |
| <b>Formula weight</b>             | 480.93 g/mol                                                            |                                                                   |
| <b>Temperature</b>                | 108(2) K                                                                |                                                                   |
| <b>Wavelength</b>                 | 0.71073 Å                                                               |                                                                   |
| <b>Crystal size</b>               | 0.540 x 0.233 x 0.143 mm                                                |                                                                   |
| <b>Crystal habit</b>              | colorless plate                                                         |                                                                   |
| <b>Crystal system</b>             | orthorhombic                                                            |                                                                   |
| <b>Space group</b>                | Pbca                                                                    |                                                                   |
| <b>Unit cell dimensions</b>       | $a = 9.4694(7) \text{ \AA}$                                             | $\alpha = 90^\circ$                                               |
|                                   | $b = 11.6800(7) \text{ \AA}$                                            | $\beta = 90^\circ$                                                |
|                                   | $c = 21.1896(11) \text{ \AA}$                                           | $\gamma = 90^\circ$                                               |
| <b>Volume</b>                     | $2343.6(3) \text{ \AA}^3$                                               |                                                                   |
| <b>Z</b>                          | 8                                                                       |                                                                   |
| <b>Density (calculated)</b>       | $2.726 \text{ g/cm}^3$                                                  |                                                                   |
| <b>Absorption coefficient</b>     | $5.874 \text{ mm}^{-1}$                                                 |                                                                   |
| <b>F(000)</b>                     | 1824                                                                    |                                                                   |
| <b>Diffractometer</b>             | Oxford XCalibur                                                         |                                                                   |
| <b>Radiation source</b>           | MoK $\alpha$ , $\lambda = 0.71073 \text{ \AA}$                          |                                                                   |
| <b>Index ranges</b>               | $-13 \leq h \leq 13, -17 \leq k \leq 13, -31 \leq l \leq 31$            |                                                                   |
| <b>Reflections collected</b>      | 4001                                                                    |                                                                   |
| <b>Absorption correction</b>      | multi-scan                                                              |                                                                   |
| <b>Max. and min. transmission</b> | 1.000 and 0.237                                                         |                                                                   |
| <b>Structure solution program</b> | SHELXT 2018/3 (Sheldrick, 2018)                                         |                                                                   |
| <b>Refinement method</b>          | Full-matrix least-squares on $F^2$                                      |                                                                   |
| <b>Refinement program</b>         | SHELXL-2018/3 (Sheldrick, 2018)                                         |                                                                   |

|                                         |                                                                                      |                           |
|-----------------------------------------|--------------------------------------------------------------------------------------|---------------------------|
| <b>Goodness-of-fit on F<sup>2</sup></b> | 1.096                                                                                |                           |
| <b>Final R indices</b>                  | 3215 data; $l > 2\sigma(l)$                                                          | R1 = 0.0328, wR2 = 0.0735 |
|                                         | all data                                                                             | R1 = 0.0489               |
| <b>Weighting scheme</b>                 | $w = 1 / [\sigma^2(F_o^2) + (0.0260P)^2 + 3.4141P]$ where $P = (F_o^2 + 2F_c^2) / 3$ |                           |
| <b>Largest diff. peak and hole</b>      | 1.020 and -0.846 eÅ <sup>-3</sup>                                                    |                           |
| <b>R.M.S. deviation from mean</b>       | 0.144 eÅ <sup>-3</sup>                                                               |                           |
| <b>CCDC-deposition number</b>           | 2072533                                                                              |                           |

Table 17: Bond angles (°) for [C<sub>2</sub>N<sub>3</sub>H<sub>3</sub>(OH)<sub>2</sub>][(AsF<sub>6</sub>)<sub>2</sub>].

|     |     |     |            |
|-----|-----|-----|------------|
| F6  | As1 | F3  | 90.67(9)   |
| F6  | As1 | F4  | 91.41(10)  |
| F3  | As1 | F4  | 90.31(10)  |
| F6  | As1 | F1  | 90.83(9)   |
| F3  | As1 | F1  | 178.19(9)  |
| F4  | As1 | F1  | 90.67(10)  |
| F6  | As1 | F5  | 178.53(9)  |
| F3  | As1 | F5  | 89.53(9)   |
| F4  | As1 | F5  | 90.04(9)   |
| F1  | As1 | F5  | 88.95(8)   |
| F6  | As1 | F2  | 90.16(9)   |
| F3  | As1 | F2  | 90.20(9)   |
| F4  | As1 | F2  | 178.35(9)  |
| F1  | As1 | F2  | 88.78(9)   |
| F5  | As1 | F2  | 88.39(8)   |
| F12 | As2 | F10 | 91.43(10)  |
| F12 | As2 | F9  | 91.26(10)  |
| F10 | As2 | F9  | 90.27(8)   |
| F12 | As2 | F8  | 91.76(9)   |
| F10 | As2 | F8  | 176.63(10) |
| F9  | As2 | F8  | 90.76(8)   |
| F12 | As2 | F11 | 90.38(11)  |
| F10 | As2 | F11 | 89.52(8)   |
| F9  | As2 | F11 | 178.35(10) |

|     |     |     |            |
|-----|-----|-----|------------|
|     |     |     | )          |
| F8  | As2 | F11 | 89.35(8)   |
| F12 | As2 | F7  | 179.77(12) |
|     |     |     | )          |
| F10 | As2 | F7  | 88.67(10)  |
| F9  | As2 | F7  | 88.53(9)   |
| F8  | As2 | F7  | 88.15(9)   |
| F11 | As2 | F7  | 89.83(10)  |
| C2  | N1  | C1  | 107.9(2)   |
| C1  | N3  | N2  | 108.4(2)   |
| C2  | N2  | N3  | 108.0(2)   |
| O1  | C1  | N3  | 123.5(2)   |
| O1  | C1  | N1  | 128.6(3)   |
| N3  | C1  | N1  | 107.9(3)   |
| O2  | C2  | N2  | 130.2(3)   |
| O2  | C2  | N1  | 122.0(2)   |
| N2  | C2  | N1  | 107.8(2)   |

Table 18: Anisotropic atomic displacement parameters ( $\text{\AA}^2$ ) for  $[\text{C}_2\text{N}_3\text{H}_3(\text{OH})_2][(\text{AsF}_6)_2]$ .

|     | $U_{11}$    | $U_{22}$    | $U_{33}$    | $U_{23}$   | $U_{13}$    | $U_{12}$    |
|-----|-------------|-------------|-------------|------------|-------------|-------------|
| As1 | 0.01570(15) | 0.01354(12) | 0.01227(12) | 0.00120(9) | 0.00223(9)  | 0.00198(10) |
|     | )           | )           | )           |            |             |             |
| As2 | 0.01630(15) | 0.01212(12) | 0.01034(11) | 0.00062(8) | -0.00090(9) | 0.00127(10) |
|     | )           | )           | )           |            |             |             |
| F9  | 0.0244(10)  | 0.0198(8)   | 0.0240(8)   | -0.0062(6) | -0.0040(7)  | 0.0080(7)   |
| F2  | 0.0197(10)  | 0.0229(8)   | 0.0201(8)   | 0.0005(6)  | 0.0067(7)   | -0.0005(7)  |
| F5  | 0.0337(11)  | 0.0156(8)   | 0.0183(8)   | -0.0009(6) | 0.0066(7)   | 0.0075(7)   |
| F8  | 0.0281(11)  | 0.0272(9)   | 0.0109(7)   | 0.0008(6)  | -0.0040(7)  | 0.0008(7)   |
| F1  | 0.0268(11)  | 0.0235(8)   | 0.0247(8)   | 0.0008(7)  | -0.0103(7)  | -0.0004(7)  |
| F7  | 0.0203(10)  | 0.0327(10)  | 0.0279(9)   | 0.0148(7)  | 0.0027(7)   | -0.0013(8)  |
| F11 | 0.0401(13)  | 0.0195(8)   | 0.0256(9)   | -0.0037(7) | -0.0084(8)  | 0.0151(8)   |
| F10 | 0.0436(13)  | 0.0256(9)   | 0.0131(7)   | -0.0039(6) | -0.0103(7)  | 0.0104(8)   |
| F6  | 0.0301(11)  | 0.0137(7)   | 0.0318(9)   | 0.0004(6)  | 0.0011(8)   | 0.0040(7)   |
| F3  | 0.0358(13)  | 0.0353(10)  | 0.0166(8)   | 0.0022(7)  | -0.0071(8)  | 0.0008(9)   |
| F4  | 0.0252(12)  | 0.0331(10)  | 0.0396(11)  | 0.0161(8)  | 0.0161(8)   | 0.0042(8)   |
| O1  | 0.0168(11)  | 0.0252(10)  | 0.0189(9)   | -0.0059(8) | 0.0018(8)   | -0.0023(8)  |



|     |            |            |            |            |            |             |
|-----|------------|------------|------------|------------|------------|-------------|
| F12 | 0.0248(12) | 0.0358(10) | 0.0409(11) | 0.0158(9)  | -0.0060(9) | -0.0127(8)  |
| O2  | 0.0182(12) | 0.0224(10) | 0.0227(10) | -0.0069(8) | 0.0024(8)  | -0.0050(8)  |
| N1  | 0.0171(12) | 0.0142(10) | 0.0112(9)  | -0.0025(8) | 0.0040(8)  | 0.0003(9)   |
| N3  | 0.0164(13) | 0.0183(11) | 0.0147(10) | -0.0062(8) | 0.0003(8)  | 0.0004(9)   |
| N2  | 0.0141(13) | 0.0210(11) | 0.0165(10) | -0.0032(8) | 0.0012(9)  | 0.0014(9)   |
| C1  | 0.0191(14) | 0.0144(11) | 0.0101(10) | 0.0001(8)  | 0.0013(9)  | 0.0004(10)  |
| C2  | 0.0190(15) | 0.0146(11) | 0.0119(10) | 0.0010(9)  | 0.0019(9)  | -0.0001(10) |

3.4  $[C_2N_3H_3(OH)_2][(SbF_6)_2] \cdot 2HF$

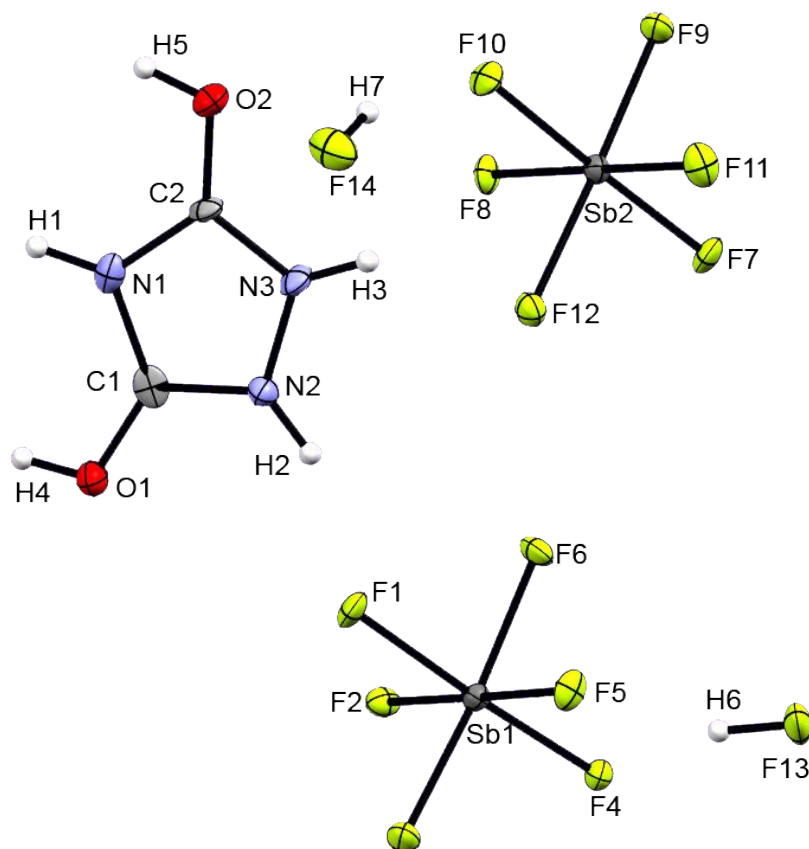

Figure 9: Asymmetric unit of  $[C_2N_3H_3(OH)_2][(SbF_6)_2] \cdot 2HF$ , view along  $a$ , displacement ellipsoids at 50% probability.

Diprotonated Urazole crystallizes as  $[C_2N_3H_3(OH)_2][(SbF_6)_2] \cdot 2HF$  in the monoclinic space group  $Pn$ . A unit cell contains 2 formula units.

Table 19: Bond lengths (Å) of  $[C_2N_3H_3(OH)_2][(SbF_6)_2] \cdot 2HF$ .

|     |    |           |
|-----|----|-----------|
| C2  | O2 | 1.273(13) |
| C2  | N3 | 1.294(14) |
| C2  | N1 | 1.372(14) |
| N3  | N2 | 1.373(8)  |
| C1  | O1 | 1.290(14) |
| C1  | N2 | 1.296(15) |
| C1  | N1 | 1.376(14) |
| Sb1 | F4 | 1.849(11) |
| Sb1 | F6 | 1.858(11) |
| Sb1 | F5 | 1.876(7)  |
| Sb1 | F3 | 1.878(11) |

|     |     |           |
|-----|-----|-----------|
| Sb1 | F2  | 1.899(6)  |
| Sb1 | F1  | 1.906(11) |
| Sb2 | F9  | 1.857(11) |
| Sb2 | F11 | 1.858(7)  |
| Sb2 | F7  | 1.877(12) |
| Sb2 | F12 | 1.879(12) |
| Sb2 | F8  | 1.880(6)  |
| Sb2 | F10 | 1.904(11) |

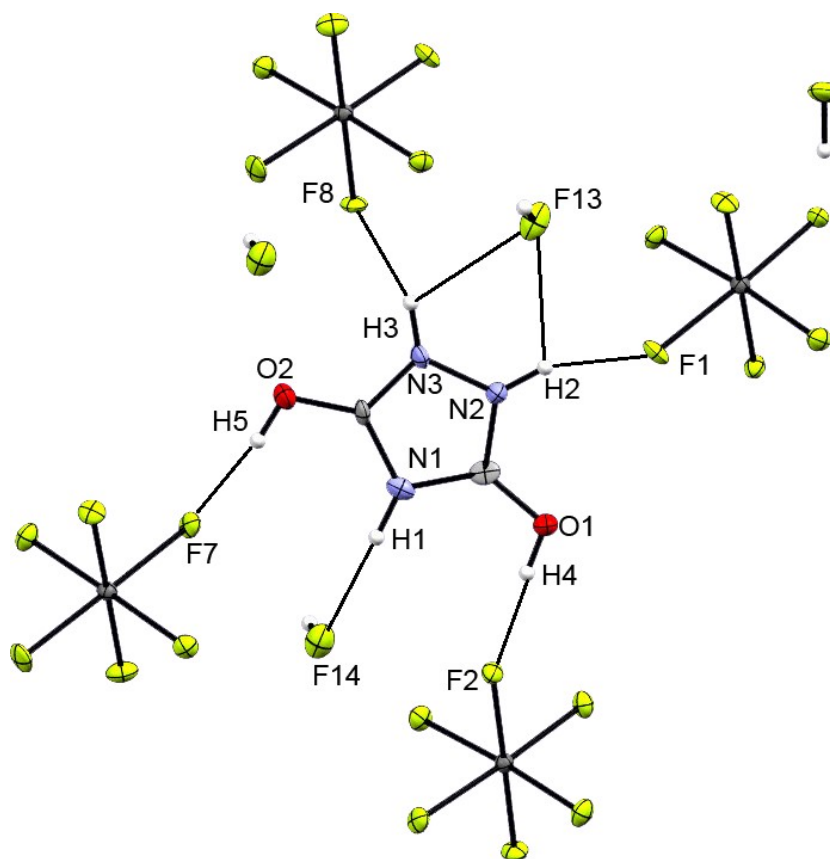

Figure 10: Particular hydrogen bonds of  $[\text{C}_2\text{N}_3\text{H}_3(\text{OH})_2][(\text{SbF}_6)_2] \cdot 2\text{HF}$ , view along  $c$ , displacement ellipsoids at 50% probability.

Table 20: Particular H-bond lengths ( $\text{\AA}$ ) for  $[\text{C}_2\text{N}_3\text{H}_3(\text{OH})_2][(\text{SbF}_6)_2] \cdot 2\text{HF}$ .

|             |     |         |
|-------------|-----|---------|
| O1 (via H4) | F2  | 2.57(1) |
| O2 (via H5) | F7  | 2.59(1) |
| N1 (via H1) | F14 | 2.87(1) |
| N2 (via H2) | F1  | 2.66(1) |
| N2 (via H2) | F13 | 2.95(1) |
| N3 (via H3) | F8  | 2.71(1) |

|             |     |         |
|-------------|-----|---------|
| N3 (via H3) | F13 | 2.96(1) |
|-------------|-----|---------|

Table 21: Data collection and structure refinement for  $[\text{C}_2\text{N}_3\text{H}_3(\text{OH})_2][\text{SbF}_6] \cdot 2\text{HF}$ .

|                                         |                                                                                                                     |                            |
|-----------------------------------------|---------------------------------------------------------------------------------------------------------------------|----------------------------|
|                                         | $[\text{C}_2\text{N}_3\text{H}_3(\text{OH})_2][\text{SbF}_6] \cdot 2\text{HF}$                                      |                            |
| <b>Chemical formula</b>                 | $\text{C}_2 \text{H}_7 \text{F}_{14} \text{N}_3 \text{O}_2 \text{Sb}_2$                                             |                            |
| <b>Formula weight</b>                   | 614.63 g/mol                                                                                                        |                            |
| <b>Temperature</b>                      | 107(2) K                                                                                                            |                            |
| <b>Wavelength</b>                       | 0.71073 Å                                                                                                           |                            |
| <b>Crystal size</b>                     | 0.327 x 0.213 x 0.129 mm                                                                                            |                            |
| <b>Crystal habit</b>                    | colorless block                                                                                                     |                            |
| <b>Crystal system</b>                   | monoclinic                                                                                                          |                            |
| <b>Space group</b>                      | P n                                                                                                                 |                            |
| <b>Unit cell dimensions</b>             | a = 6.5268(4) Å                                                                                                     | $\alpha = 90^\circ$        |
|                                         | b = 8.4200(5) Å                                                                                                     | $\beta = 102.487(7)^\circ$ |
|                                         | c = 12.0682(8) Å                                                                                                    | $\gamma = 90^\circ$        |
| <b>Volume</b>                           | 647.53(7) Å <sup>3</sup>                                                                                            |                            |
| <b>Z</b>                                | 2                                                                                                                   |                            |
| <b>Density (calculated)</b>             | 3.512 g/cm <sup>3</sup>                                                                                             |                            |
| <b>Absorption coefficient</b>           | 4.359 mm <sup>-1</sup>                                                                                              |                            |
| <b>F(000)</b>                           | 568                                                                                                                 |                            |
| <b>Diffractometer</b>                   | Oxford XCalibur                                                                                                     |                            |
| <b>Radiation source</b>                 | MoK $\alpha$ , $\lambda = 0.71073$ Å                                                                                |                            |
| <b>Index ranges</b>                     | -9<=h<=9, -12<=k<=12, -17<=l<=18                                                                                    |                            |
| <b>Reflections collected</b>            | 4344                                                                                                                |                            |
| <b>Absorption correction</b>            | multi-scan                                                                                                          |                            |
| <b>Max. and min. transmission</b>       | 1.000 and 0.502                                                                                                     |                            |
| <b>Structure solution program</b>       | SHELXT 2018/3 (Sheldrick, 2018)                                                                                     |                            |
| <b>Refinement method</b>                | Full-matrix least-squares on F <sup>2</sup>                                                                         |                            |
| <b>Refinement program</b>               | SHELXL-2018/3 (Sheldrick, 2018)                                                                                     |                            |
| <b>Goodness-of-fit on F<sup>2</sup></b> | 1.044                                                                                                               |                            |
| <b>Final R indices</b>                  | 3585 data; $l > 2 \sigma(l)$                                                                                        | R1 = 0.0288, wR2 = 0.0568  |
|                                         | all data                                                                                                            | R1 = 0.0410                |
| <b>Weighting scheme</b>                 | w=1/[ $\sigma_s^2(F_o^2) + (0.0175P)^2$ ] where<br>P=(F <sub>o</sub> <sup>2</sup> +2F <sub>c</sub> <sup>2</sup> )/3 |                            |
| <b>Largest diff. peak and hole</b>      | 1.121 and -0.843 eÅ <sup>-3</sup>                                                                                   |                            |

|                                   |                        |
|-----------------------------------|------------------------|
| <b>R.M.S. deviation from mean</b> | 0.178 eÅ <sup>-3</sup> |
| <b>CCDC-deposition number</b>     | 2072532                |

Table 22: Bond angles (°) for [C<sub>2</sub>N<sub>3</sub>H<sub>3</sub>(OH)<sub>2</sub>][(SbF<sub>6</sub>)<sub>2</sub>] · 2HF.

|     |     |     |           |
|-----|-----|-----|-----------|
| O2  | C2  | N3  | 123.9(11) |
| O2  | C2  | N1  | 128.4(11) |
| N3  | C2  | N1  | 107.6(9)  |
| C2  | N3  | N2  | 110.0(8)  |
| O1  | C1  | N2  | 122.1(11) |
| O1  | C1  | N1  | 128.6(12) |
| N2  | C1  | N1  | 109.3(10) |
| C1  | N2  | N3  | 107.0(8)  |
| C2  | N1  | C1  | 106.0(10) |
| F4  | Sb1 | F6  | 90.5(5)   |
| F4  | Sb1 | F5  | 89.2(4)   |
| F6  | Sb1 | F5  | 89.4(4)   |
| F4  | Sb1 | F3  | 94.4(5)   |
| F6  | Sb1 | F3  | 175.1(6)  |
| F5  | Sb1 | F3  | 91.0(4)   |
| F4  | Sb1 | F2  | 90.5(5)   |
| F6  | Sb1 | F2  | 89.4(5)   |
| F5  | Sb1 | F2  | 178.8(7)  |
| F3  | Sb1 | F2  | 90.2(5)   |
| F4  | Sb1 | F1  | 176.9(6)  |
| F6  | Sb1 | F1  | 86.5(5)   |
| F5  | Sb1 | F1  | 91.1(4)   |
| F3  | Sb1 | F1  | 88.6(5)   |
| F2  | Sb1 | F1  | 89.0(5)   |
| F9  | Sb2 | F11 | 91.8(4)   |
| F9  | Sb2 | F7  | 89.8(5)   |
| F11 | Sb2 | F7  | 90.4(4)   |
| F9  | Sb2 | F12 | 178.2(6)  |
| F11 | Sb2 | F12 | 89.1(4)   |
| F7  | Sb2 | F12 | 91.8(5)   |
| F9  | Sb2 | F8  | 89.4(5)   |
| F11 | Sb2 | F8  | 178.2(6)  |

|     |     |     |          |
|-----|-----|-----|----------|
| F7  | Sb2 | F8  | 90.9(5)  |
| F12 | Sb2 | F8  | 89.7(5)  |
| F9  | Sb2 | F10 | 88.8(5)  |
| F11 | Sb2 | F10 | 88.9(4)  |
| F7  | Sb2 | F10 | 178.5(6) |
| F12 | Sb2 | F10 | 89.6(5)  |
| F8  | Sb2 | F10 | 89.7(5)  |

Table 23: Anisotropic atomic displacement parameters ( $\text{\AA}^2$ ) for  $[\text{C}_2\text{N}_3\text{H}_3(\text{OH})_2][(\text{SbF}_6)_2] \cdot 2\text{HF}$ .

|     | $U_{11}$   | $U_{22}$   | $U_{33}$   | $U_{23}$   | $U_{13}$   | $U_{12}$   |
|-----|------------|------------|------------|------------|------------|------------|
| C2  | 0.009(5)   | 0.020(6)   | 0.009(5)   | -0.002(4)  | -0.002(4)  | 0.000(4)   |
| N3  | 0.014(3)   | 0.017(3)   | 0.012(3)   | 0.001(2)   | -0.004(3)  | -0.001(2)  |
| C1  | 0.024(7)   | 0.007(4)   | 0.015(6)   | -0.006(4)  | 0.010(5)   | 0.002(4)   |
| N2  | 0.013(3)   | 0.014(3)   | 0.016(3)   | 0.002(2)   | 0.001(3)   | -0.002(2)  |
| N1  | 0.021(4)   | 0.013(3)   | 0.011(3)   | 0.000(3)   | 0.005(3)   | 0.005(3)   |
| O1  | 0.017(3)   | 0.016(3)   | 0.018(3)   | 0.004(2)   | 0.002(2)   | -0.002(2)  |
| O2  | 0.015(3)   | 0.025(3)   | 0.016(3)   | 0.003(2)   | -0.001(2)  | 0.000(2)   |
| Sb1 | 0.0105(4)  | 0.0104(4)  | 0.0100(4)  | 0.0000(4)  | 0.0020(3)  | 0.0001(4)  |
| F1  | 0.0174(11) | 0.0181(11) | 0.0113(10) | 0.004(3)   | -0.0007(9) | 0.007(3)   |
| F2  | 0.012(4)   | 0.011(4)   | 0.017(4)   | -0.001(4)  | 0.002(3)   | -0.001(4)  |
| F3  | 0.0131(10) | 0.0196(11) | 0.0180(12) | 0.004(3)   | 0.0067(9)  | 0.003(3)   |
| F4  | 0.013(3)   | 0.017(3)   | 0.012(4)   | 0.004(3)   | 0.001(3)   | -0.001(2)  |
| F5  | 0.022(4)   | 0.007(3)   | 0.017(4)   | 0.000(4)   | 0.002(3)   | 0.003(4)   |
| F6  | 0.012(4)   | 0.019(4)   | 0.016(4)   | 0.000(2)   | 0.007(3)   | -0.003(3)  |
| Sb2 | 0.0113(4)  | 0.0093(4)  | 0.0102(4)  | -0.0002(4) | 0.0023(3)  | -0.0004(4) |
| F7  | 0.0174(11) | 0.0181(11) | 0.0113(10) | 0.004(3)   | -0.0007(9) | 0.007(3)   |
| F8  | 0.021(4)   | 0.008(4)   | 0.016(5)   | 0.004(3)   | 0.004(4)   | -0.001(4)  |
| F9  | 0.0131(10) | 0.0196(11) | 0.0180(12) | 0.004(3)   | 0.0067(9)  | 0.003(3)   |
| F10 | 0.016(4)   | 0.030(4)   | 0.007(4)   | 0.000(3)   | -0.002(3)  | -0.002(3)  |
| F11 | 0.026(5)   | 0.012(3)   | 0.020(4)   | -0.001(5)  | 0.010(4)   | 0.001(5)   |
| F12 | 0.016(4)   | 0.017(4)   | 0.013(3)   | 0.001(2)   | 0.005(3)   | -0.001(3)  |

|     |          |          |          |           |          |           |
|-----|----------|----------|----------|-----------|----------|-----------|
| F13 | 0.023(4) | 0.028(3) | 0.026(4) | 0.016(3)  | 0.012(3) | 0.006(3)  |
| F14 | 0.024(4) | 0.035(4) | 0.021(3) | -0.008(3) | 0.008(3) | -0.006(3) |

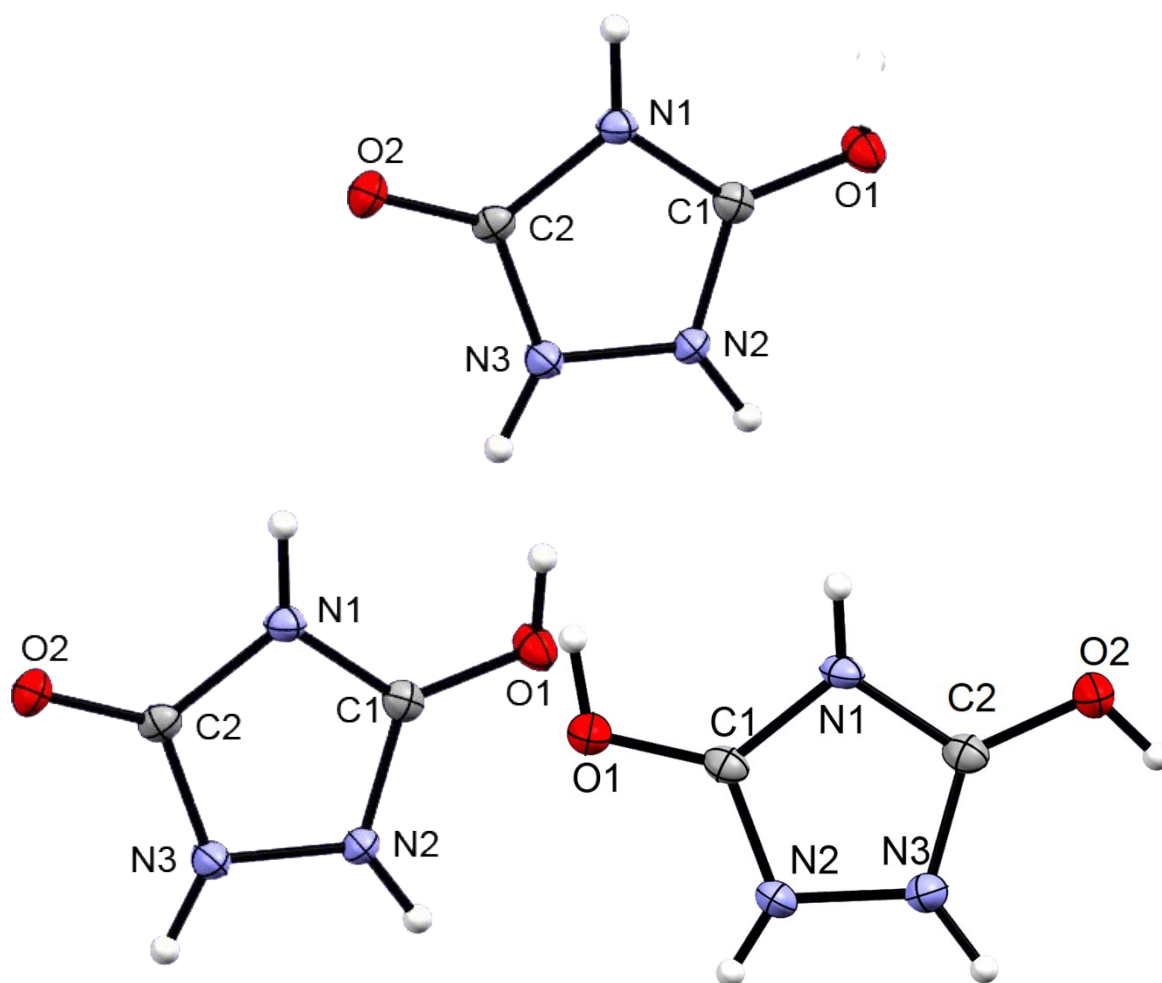

Table 24: Comparison of bond lengths (Å) of urazole,  $[C_2N_3H_3O(OH)]$  and  $[(C_2N_3H_3(OH)_2)]$ .

| $C_2N_3H_3O_2^{[11]}$ |    |          | $[C_2N_3H_3O(OH)]$ |    |          | $[C_2N_3H_3(OH)_2]$ |    |          |
|-----------------------|----|----------|--------------------|----|----------|---------------------|----|----------|
| O2                    | C2 | 1.237(1) | O2                 | C2 | 1.233(3) | O2                  | C2 | 1.282(3) |
| O1                    | C1 | 1.232(1) | O1                 | C1 | 1.284(3) | O1                  | C1 | 1.278(3) |
|                       |    |          |                    |    |          |                     |    |          |
| N1                    | C1 | 1.378(1) | N1                 | C1 | 1.347(3) | N1                  | C1 | 1.355(3) |
| N1                    | C2 | 1.380(1) | N1                 | C2 | 1.389(3) | N1                  | C2 | 1.354(4) |
|                       |    |          |                    |    |          |                     |    |          |
| N3                    | C2 | 1.354(1) | N3                 | C2 | 1.342(3) | N3                  | C2 | 1.316(3) |
| N2                    | C1 | 1.367(1) | N2                 | C1 | 1.315(3) | N2                  | C1 | 1.308(4) |
|                       |    |          |                    |    |          |                     |    |          |
| N3                    | N2 | 1.410(1) | N3                 | N2 | 1.380(3) | N3                  | N2 | 1.372(4) |

## 4. NMR data

### 4.1 Urazole

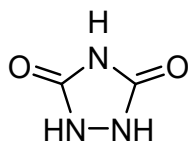

NMR (aHF, 20 ° C) (ppm):  $\delta(^1\text{H}) = 5.33$  (N-H);  $\delta(^{14}\text{N}) = -244.69$ ;  $\delta(^{13}\text{C}) = 151.75$ .

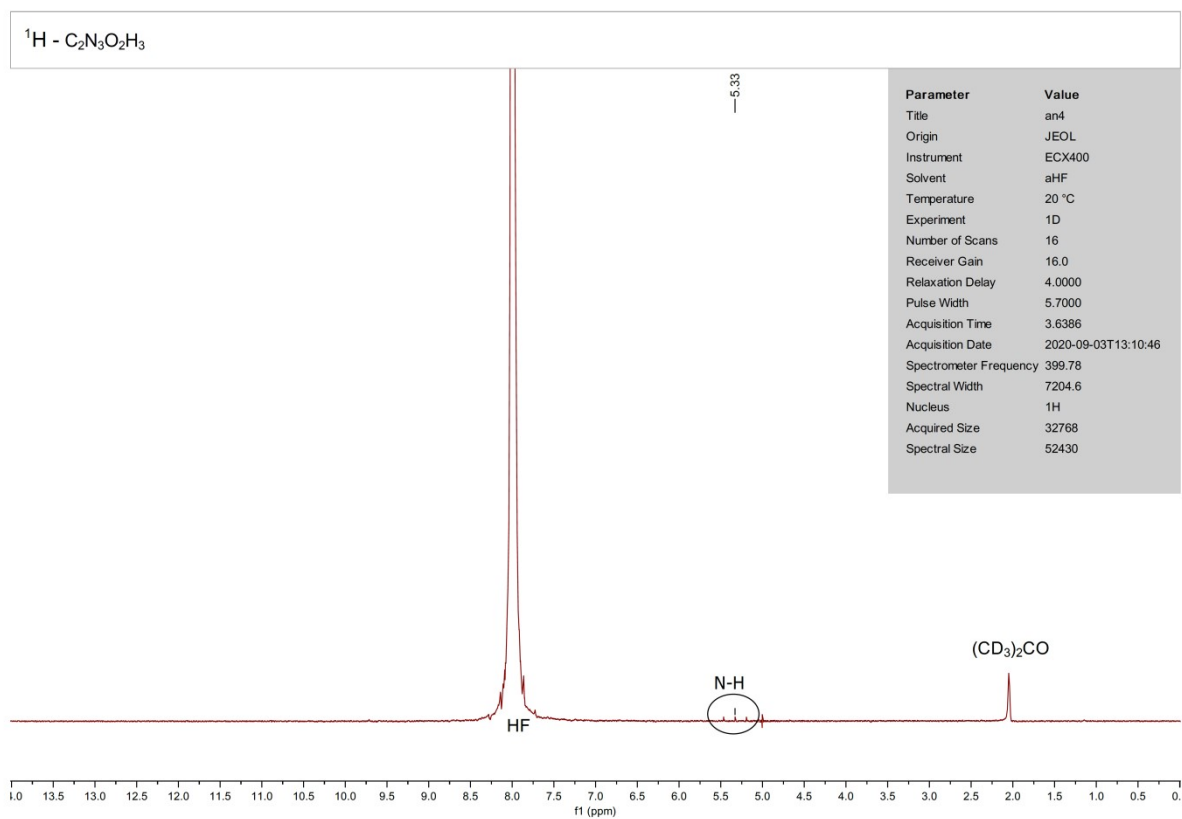



$^{14}\text{N} - \text{C}_2\text{N}_3\text{O}_2\text{H}_3$

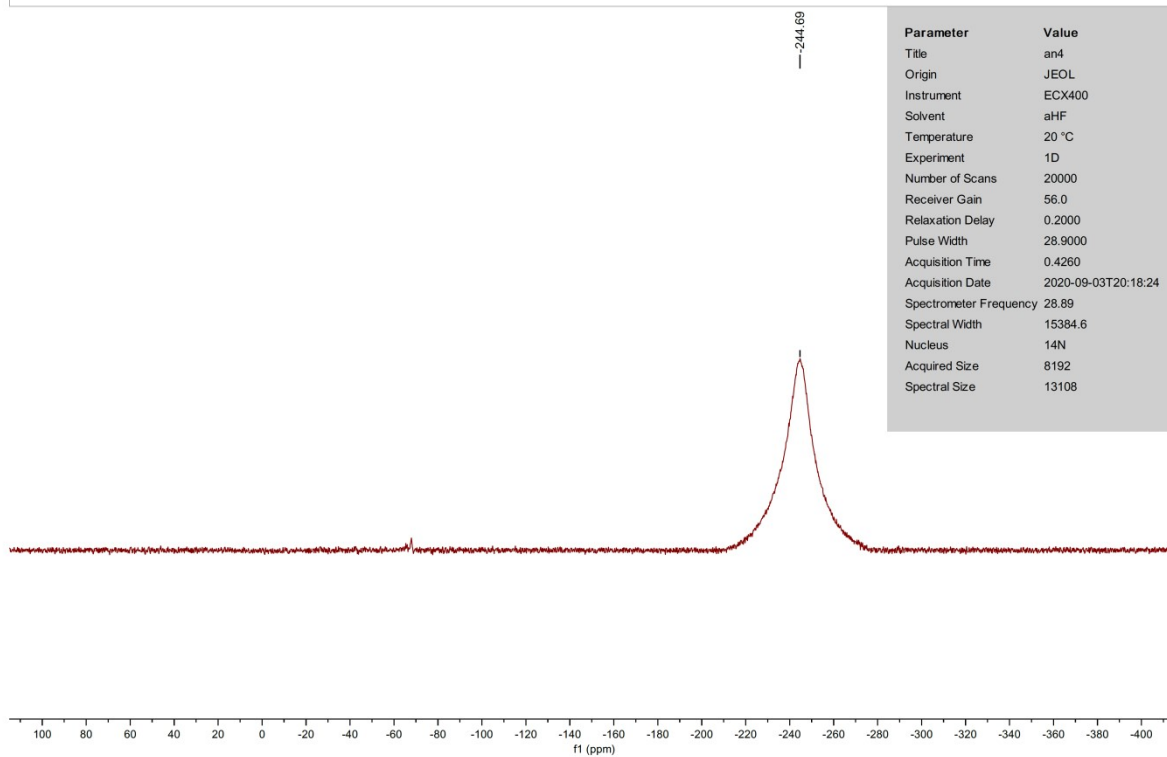

$^{13}\text{C} - \text{C}_2\text{N}_3\text{O}_2\text{H}_3$

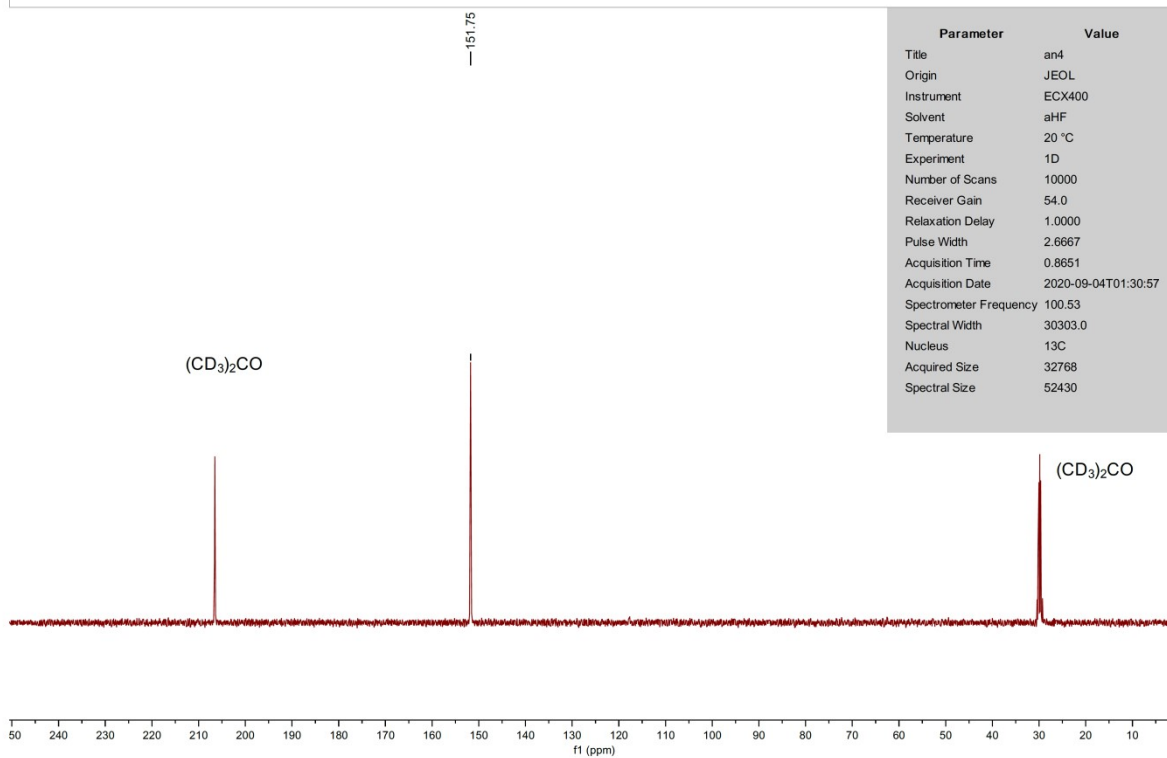

4.2  $[C_2N_3H_3O(OH)][SbF_6]$

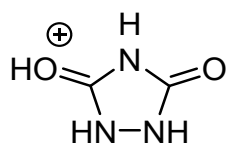

NMR (aHF, 25 ° C) (ppm):  $\delta(^{14}N) = -246.67$ ;  $\delta(^{13}C) = 151.60$ .

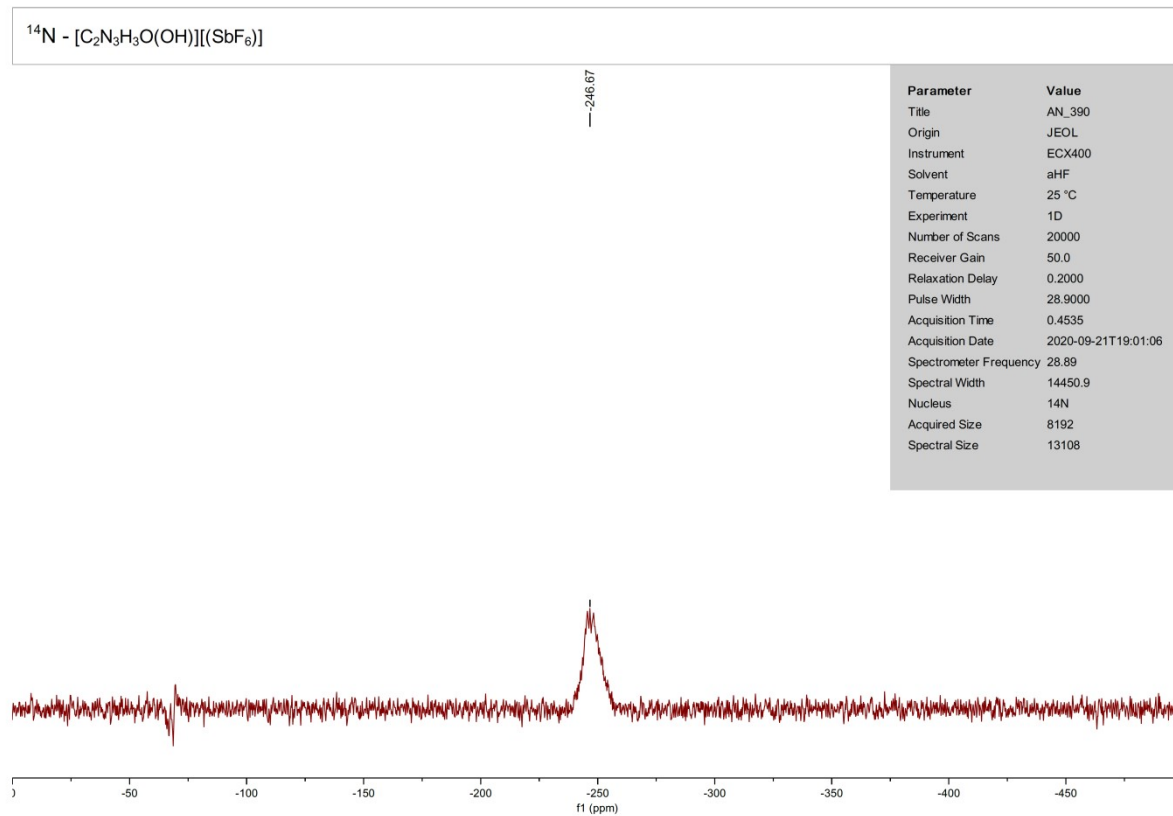

$^{13}\text{C}$  -  $[\text{C}_2\text{N}_3\text{H}_3\text{O}(\text{OH})][\text{SbF}_6]$

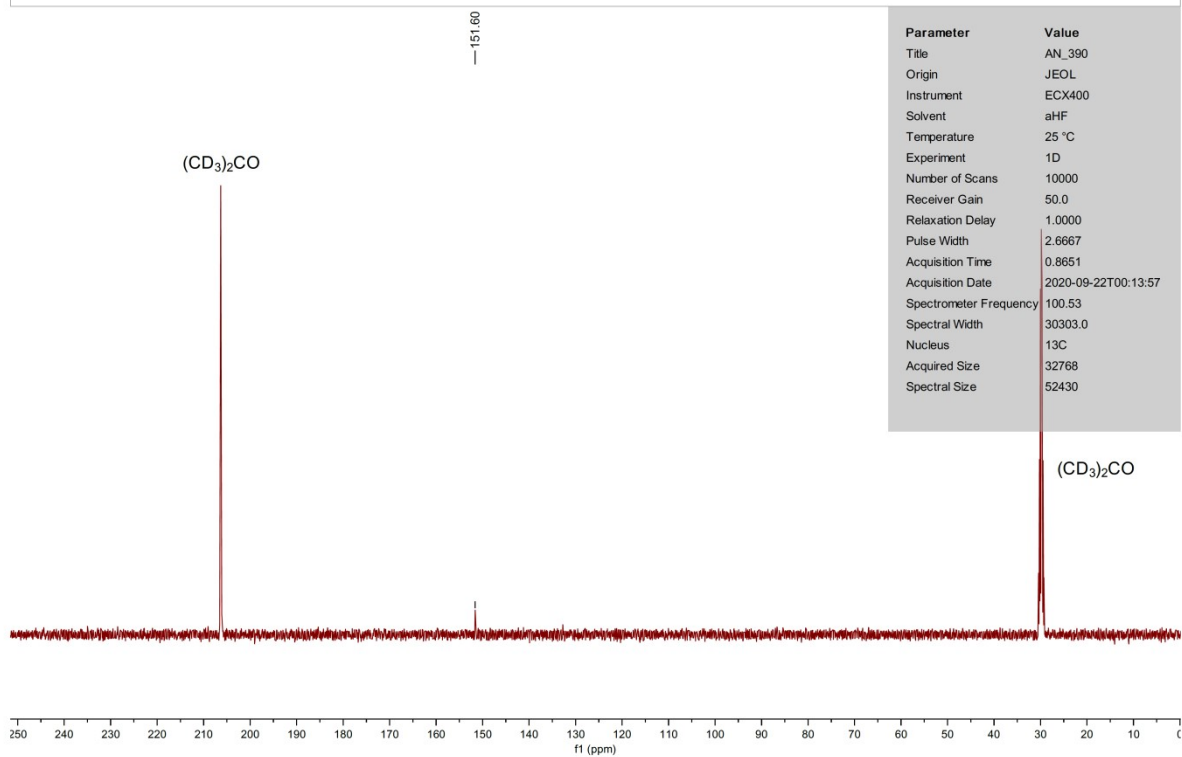

4.3  $[C_2N_3H_3(OH)_2][[SbF_6]_2]$

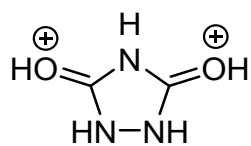

NMR (aHF,  $-40$  to  $-30$  ° C) (ppm):  $\delta(^1H) = 10.09$  (OH<sup>+</sup>);  $\delta(^{13}C) = 151.12$ .

NMR (aHF,  $25$  ° C) (ppm):  $\delta(^1H) = 10.17$  (OH<sup>+</sup>);  $\delta(^{14}N) = -241.55$ .

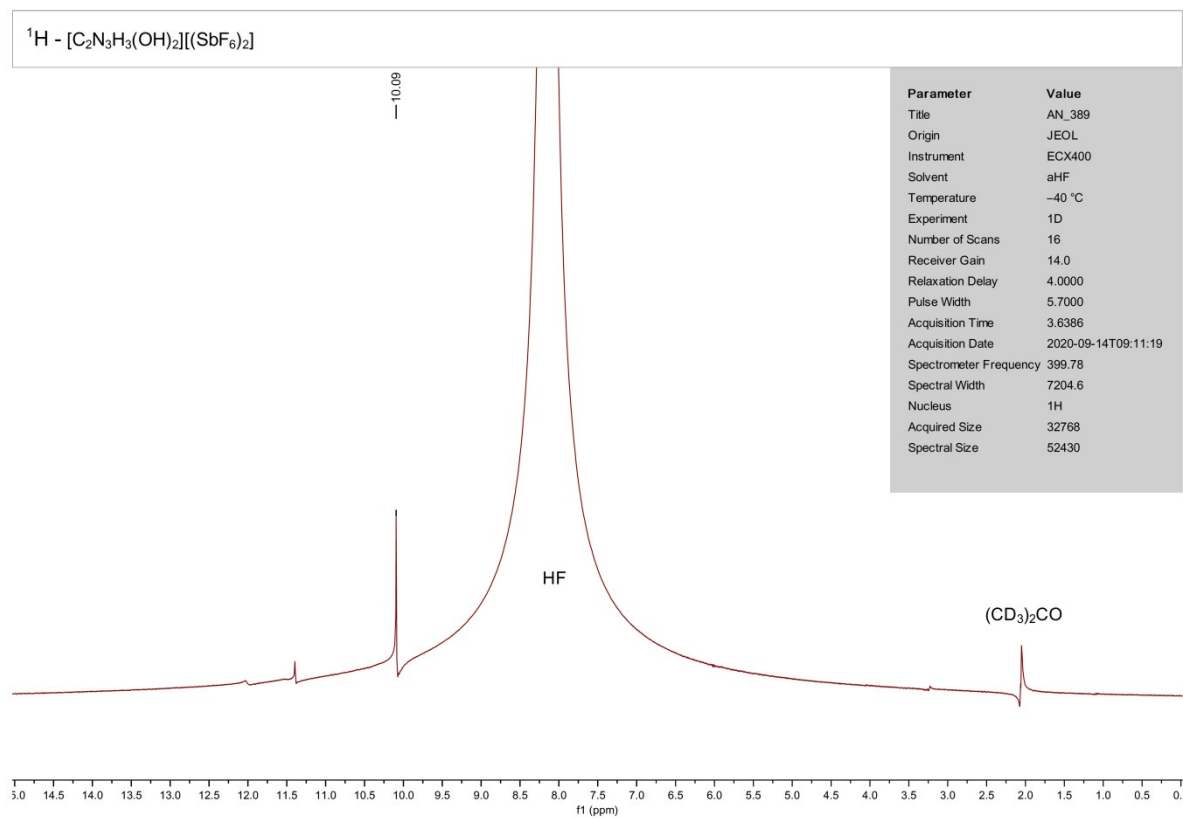

$^1\text{H}$  -  $[\text{C}_2\text{N}_3\text{H}_3(\text{OH})_2][(\text{SbF}_6)_2]$

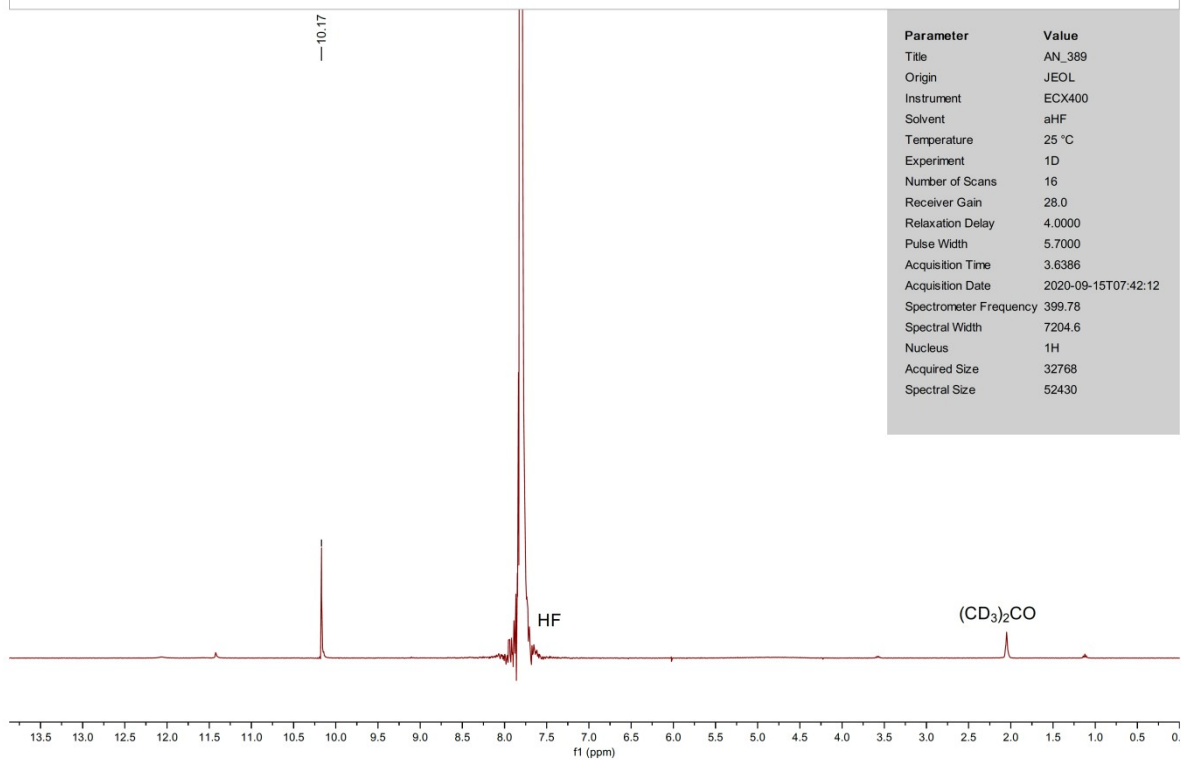

| Parameter              | Value               |
|------------------------|---------------------|
| Title                  | AN_389              |
| Origin                 | JEOL                |
| Instrument             | ECX400              |
| Solvent                | aHF                 |
| Temperature            | 25 °C               |
| Experiment             | 1D                  |
| Number of Scans        | 16                  |
| Receiver Gain          | 28.0                |
| Relaxation Delay       | 4.0000              |
| Pulse Width            | 5.7000              |
| Acquisition Time       | 3.6386              |
| Acquisition Date       | 2020-09-15T07:42:12 |
| Spectrometer Frequency | 399.78              |
| Spectral Width         | 7204.6              |
| Nucleus                | $^1\text{H}$        |
| Acquired Size          | 32768               |
| Spectral Size          | 52430               |

$^{13}\text{C}$  -  $[\text{C}_2\text{N}_3\text{H}_3(\text{OH})_2][(\text{SbF}_6)_2]$

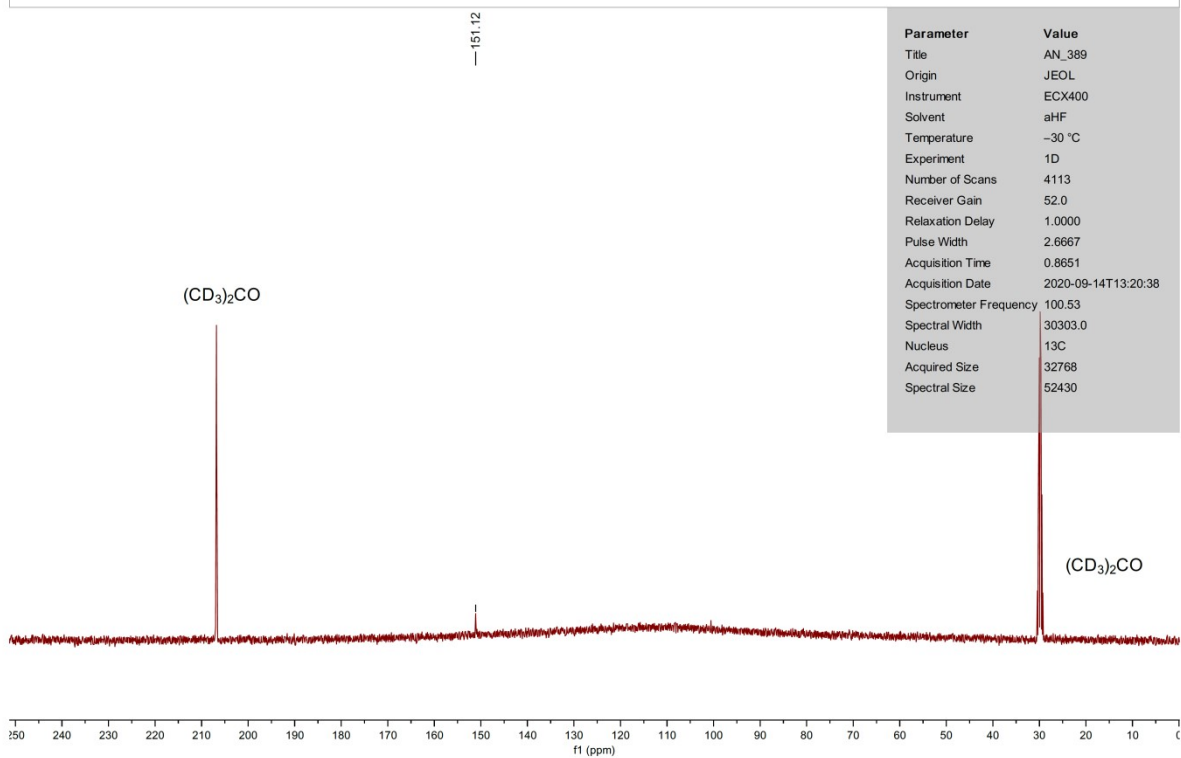

| Parameter              | Value               |
|------------------------|---------------------|
| Title                  | AN_389              |
| Origin                 | JEOL                |
| Instrument             | ECX400              |
| Solvent                | aHF                 |
| Temperature            | -30 °C              |
| Experiment             | 1D                  |
| Number of Scans        | 4113                |
| Receiver Gain          | 52.0                |
| Relaxation Delay       | 1.0000              |
| Pulse Width            | 2.6667              |
| Acquisition Time       | 0.8651              |
| Acquisition Date       | 2020-09-14T13:20:38 |
| Spectrometer Frequency | 100.53              |
| Spectral Width         | 30303.0             |
| Nucleus                | $^{13}\text{C}$     |
| Acquired Size          | 32768               |
| Spectral Size          | 52430               |

$^{14}\text{N}$  -  $[\text{C}_2\text{N}_3\text{H}_3(\text{OH})_2][(\text{SbF}_6)_2]$

—241.65

| Parameter              | Value               |
|------------------------|---------------------|
| Title                  | AN_389              |
| Origin                 | JEOL                |
| Instrument             | ECX400              |
| Solvent                | aHF                 |
| Temperature            | 25 °C               |
| Experiment             | 1D                  |
| Number of Scans        | 25000               |
| Receiver Gain          | 56.0                |
| Relaxation Delay       | 0.2000              |
| Pulse Width            | 28.9000             |
| Acquisition Time       | 0.4535              |
| Acquisition Date       | 2020-09-14T18:06:29 |
| Spectrometer Frequency | 28.89               |
| Spectral Width         | 14450.9             |
| Nucleus                | 14N                 |
| Acquired Size          | 8192                |
| Spectral Size          | 13108               |

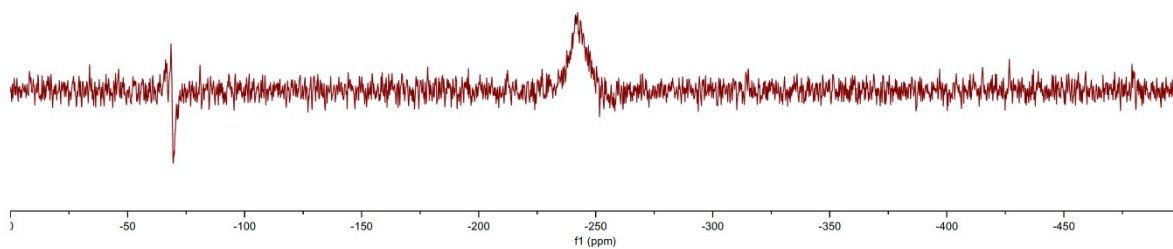

## 5. Quantum chemical calculations

### 5.1 Urazole

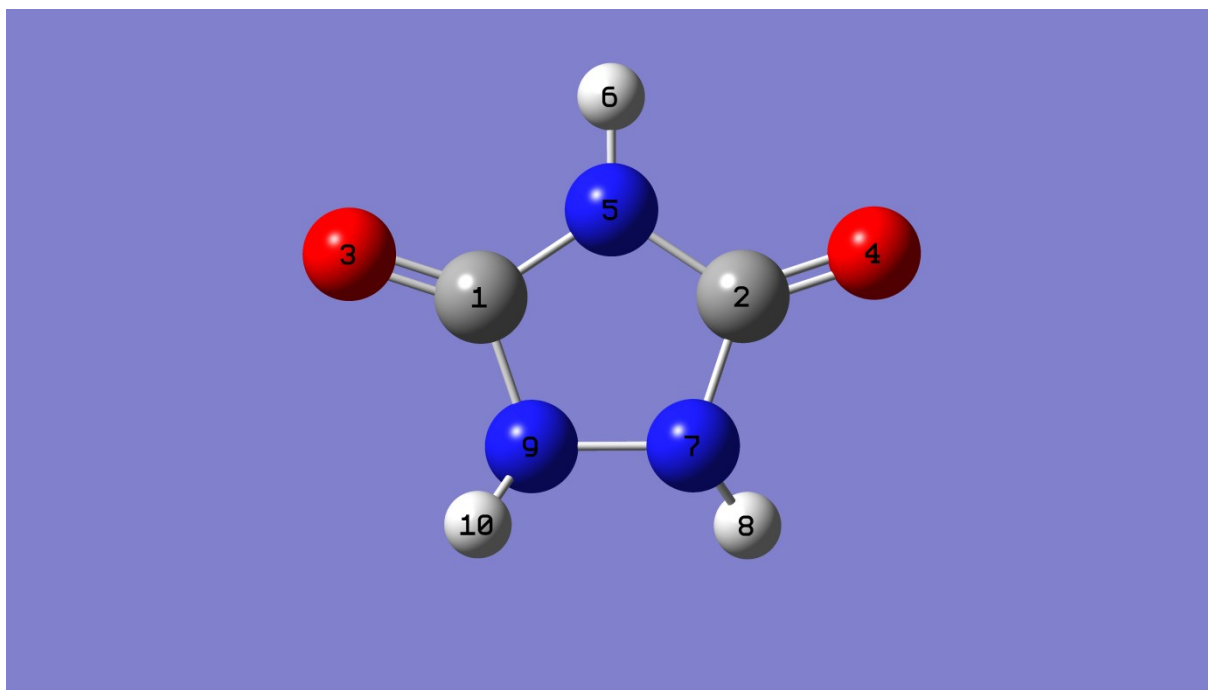

Figure 11: Optimized structure of urazole.

$E(\text{RB3LYP}) = -392.721057950$  Hartree

Standard orientation:

---

| Center<br>Number | Atomic<br>Number | Atomic<br>Type | Coordinates (Angstroms) |           |           |
|------------------|------------------|----------------|-------------------------|-----------|-----------|
|                  |                  |                | X                       | Y         | Z         |
| 1                | 6                | 0              | -1.164644               | -0.179483 | 0.029597  |
| 2                | 6                | 0              | 1.164643                | -0.179478 | -0.029562 |
| 3                | 8                | 0              | -2.336473               | -0.561909 | -0.012535 |
| 4                | 8                | 0              | 2.336472                | -0.561930 | 0.012389  |
| 5                | 7                | 0              | -0.000023               | -0.952382 | 0.000133  |
| 6                | 1                | 0              | -0.000060               | -1.957373 | -0.000131 |

---

|    |   |   |           |          |           |
|----|---|---|-----------|----------|-----------|
| 7  | 7 | 0 | 0.711826  | 1.147772 | -0.104738 |
| 8  | 1 | 0 | 1.228523  | 1.849621 | 0.403437  |
| 9  | 7 | 0 | -0.711816 | 1.147852 | 0.104813  |
| 10 | 1 | 0 | -1.228358 | 1.849535 | -0.403806 |

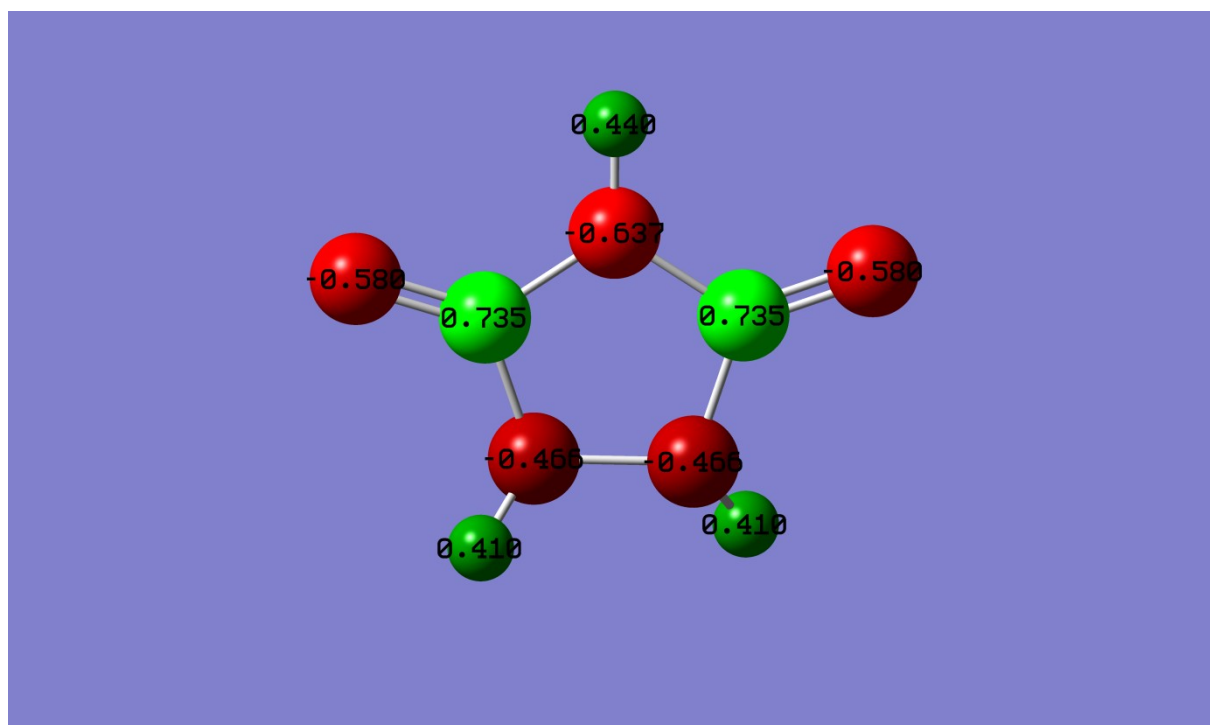

Figure 12: NPA charges of urazole.



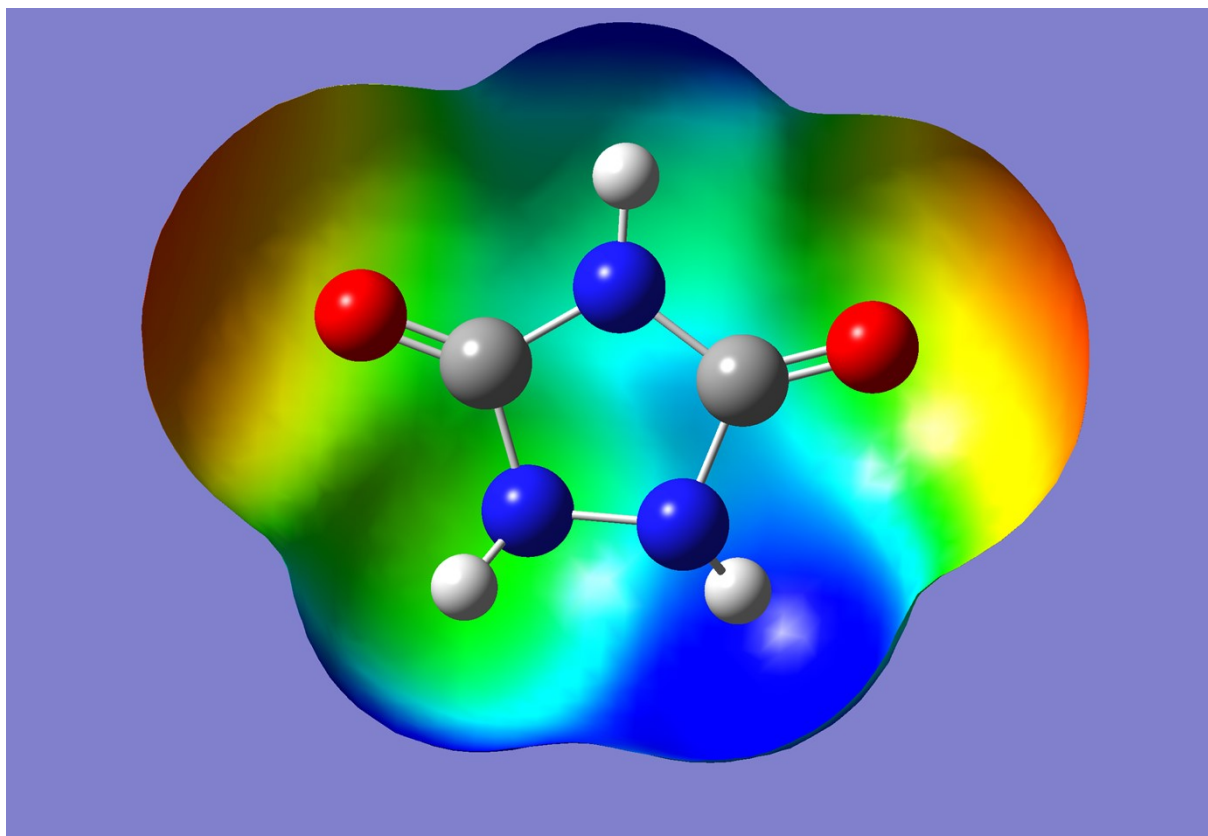

Figure 13: Molecular 0.0004 bohr<sup>-3</sup> 3D isosurfaces with mapped electrostatic potential of urazole (color scale ranging from -0.05 a.u. [red] to 0.05 a.u. [blue]).

## 5.2 $[C_2N_3H_3O(OH)]$

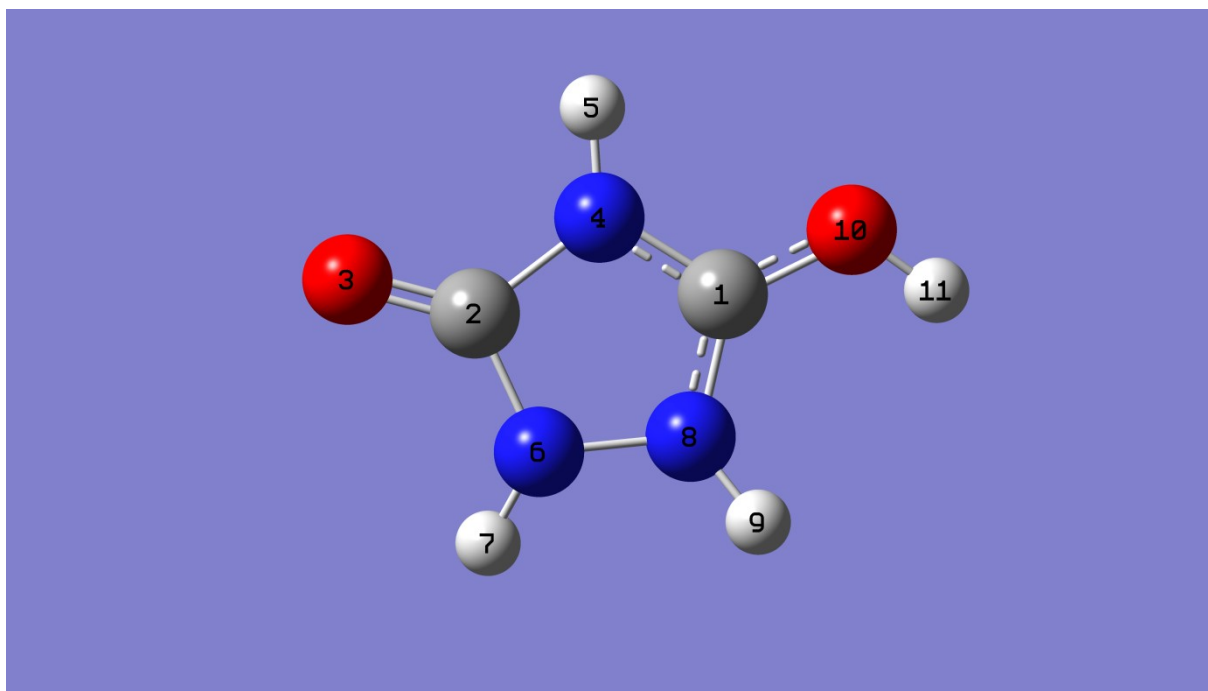

Figure 14: Optimized structure of  $[C_2N_3H_3O(OH)]$ .

$E(\text{RB3LYP}) = -393.037872928$  Hartree

Standard orientation:

---

| Center<br>Number | Atomic<br>Number | Atomic<br>Type | Coordinates (Angstroms) |           |           |
|------------------|------------------|----------------|-------------------------|-----------|-----------|
|                  |                  |                | X                       | Y         | Z         |
| 1                | 6                | 0              | 1.053210                | -0.123628 | 0.014108  |
| 2                | 6                | 0              | -1.239565               | -0.182968 | -0.012475 |
| 3                | 8                | 0              | -2.373394               | -0.610105 | 0.013912  |
| 4                | 7                | 0              | -0.008327               | -0.940175 | -0.009509 |
| 5                | 1                | 0              | 0.031146                | -1.950377 | 0.011321  |
| 6                | 7                | 0              | -0.782591               | 1.140740  | -0.064120 |
| 7                | 1                | 0              | -1.307821               | 1.935941  | 0.270947  |
| 8                | 7                | 0              | 0.628259                | 1.147241  | 0.036081  |

---

|    |   |   |          |           |           |
|----|---|---|----------|-----------|-----------|
| 9  | 1 | 0 | 1.153562 | 1.986428  | -0.161648 |
| 10 | 8 | 0 | 2.293022 | -0.591255 | -0.008280 |
| 11 | 1 | 0 | 3.022831 | 0.043829  | 0.087361  |

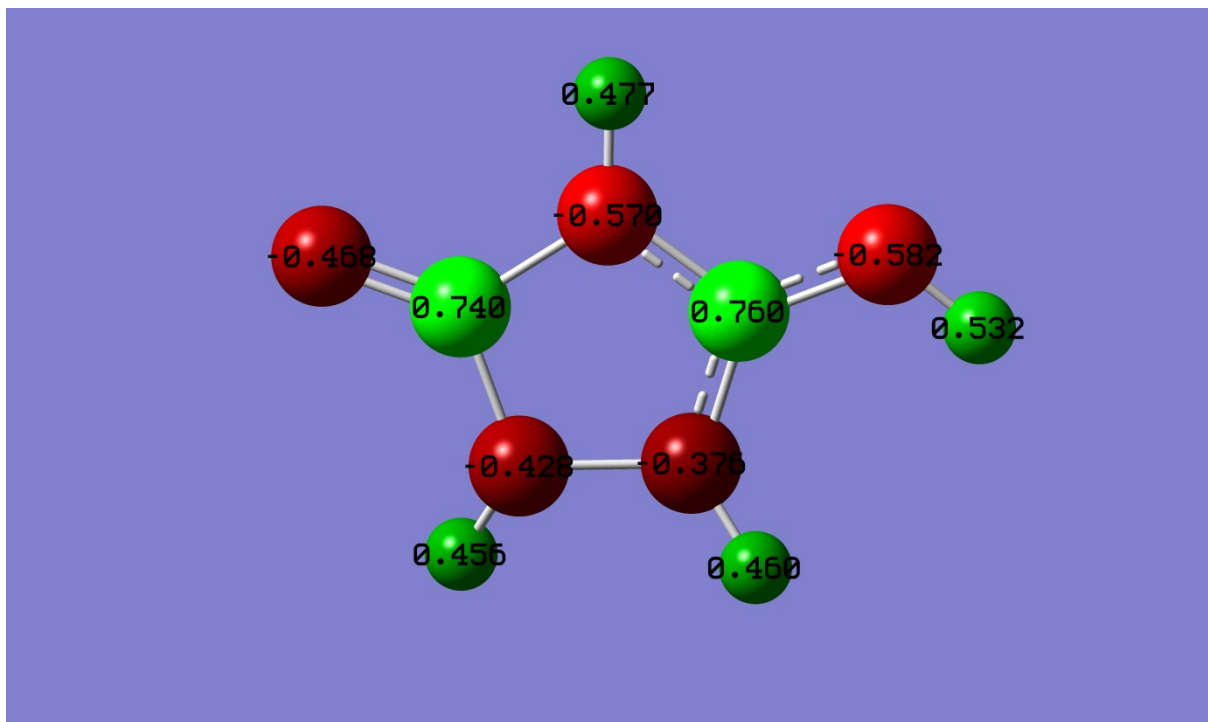

Figure 15: NPA charges of  $[\text{C}_2\text{N}_3\text{H}_3\text{O}(\text{OH})]$ .

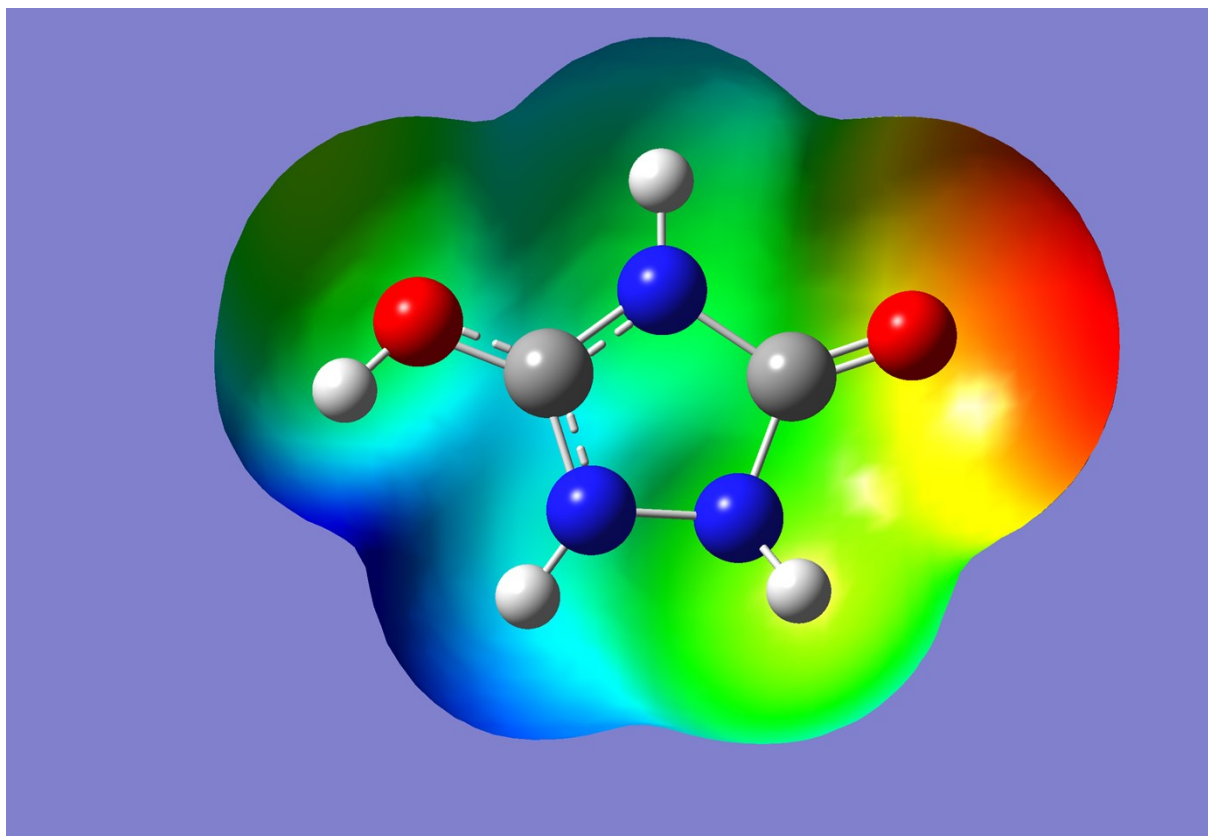

Figure 16: Molecular  $0.0004 \text{ bohr}^{-3}$  3D isosurfaces with mapped electrostatic potential of  $[\text{C}_2\text{N}_3\text{H}_3\text{O}(\text{OH})]$  (color scale ranging from 0.07 a.u. [red] to 0.24 a.u. [blue]).

### 5.3 $[C_2N_3H_3(OH)_2]$

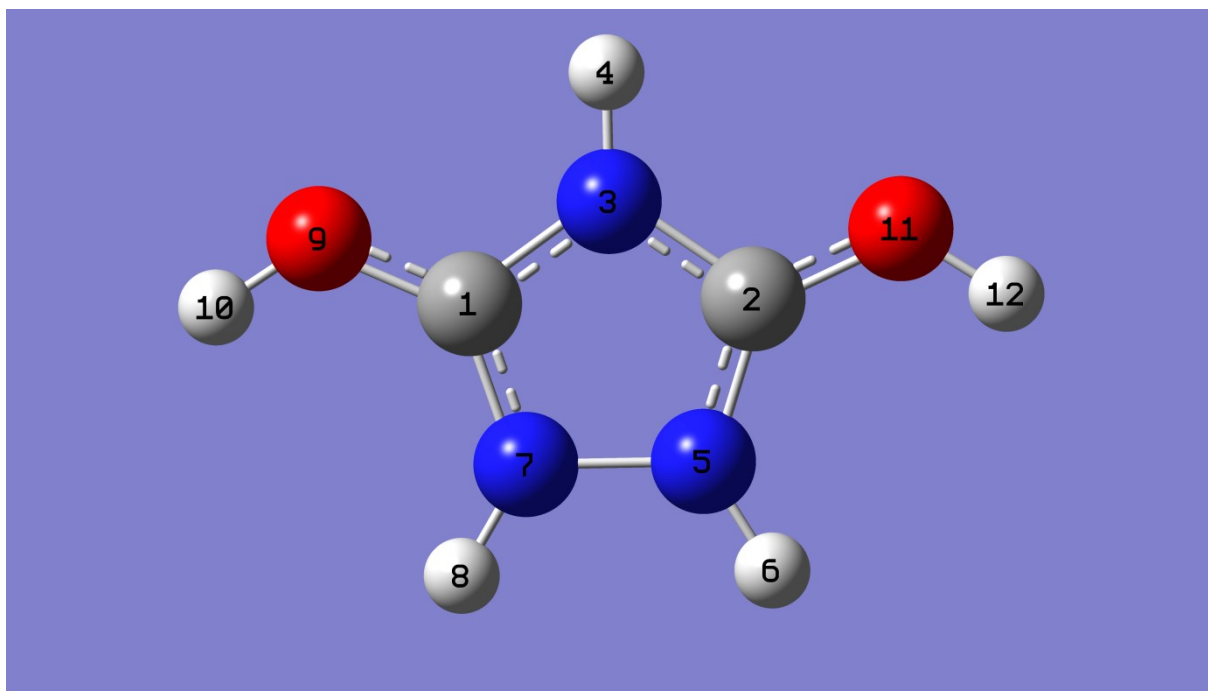

Figure 17: Optimized structure of  $[C_2N_3H_3(OH)_2]$ .

$E(\text{RB3LYP}) = -393.196301560$  Hartree

Standard orientation:

| Center<br>Number | Atomic<br>Number | Atomic<br>Type | Coordinates (Angstroms) |           |           |
|------------------|------------------|----------------|-------------------------|-----------|-----------|
|                  |                  |                | X                       | Y         | Z         |
| 1                | 6                | 0              | -1.121230               | -0.116805 | 0.000012  |
| 2                | 6                | 0              | 1.121244                | -0.116701 | -0.000076 |
| 3                | 7                | 0              | 0.000047                | -0.905603 | 0.000038  |
| 4                | 1                | 0              | 0.000173                | -1.925780 | 0.000115  |
| 5                | 7                | 0              | 0.701470                | 1.161503  | -0.000053 |
| 6                | 1                | 0              | 1.228036                | 2.032093  | 0.000609  |
| 7                | 7                | 0              | -0.701547               | 1.161476  | 0.000099  |
| 8                | 1                | 0              | -1.228171               | 2.032027  | -0.000524 |

|    |   |   |           |           |           |
|----|---|---|-----------|-----------|-----------|
| 9  | 8 | 0 | -2.301321 | -0.651002 | 0.000035  |
| 10 | 1 | 0 | -3.125271 | -0.121590 | -0.000443 |
| 11 | 8 | 0 | 2.301326  | -0.650966 | 0.000005  |
| 12 | 1 | 0 | 3.125313  | -0.121596 | -0.000278 |

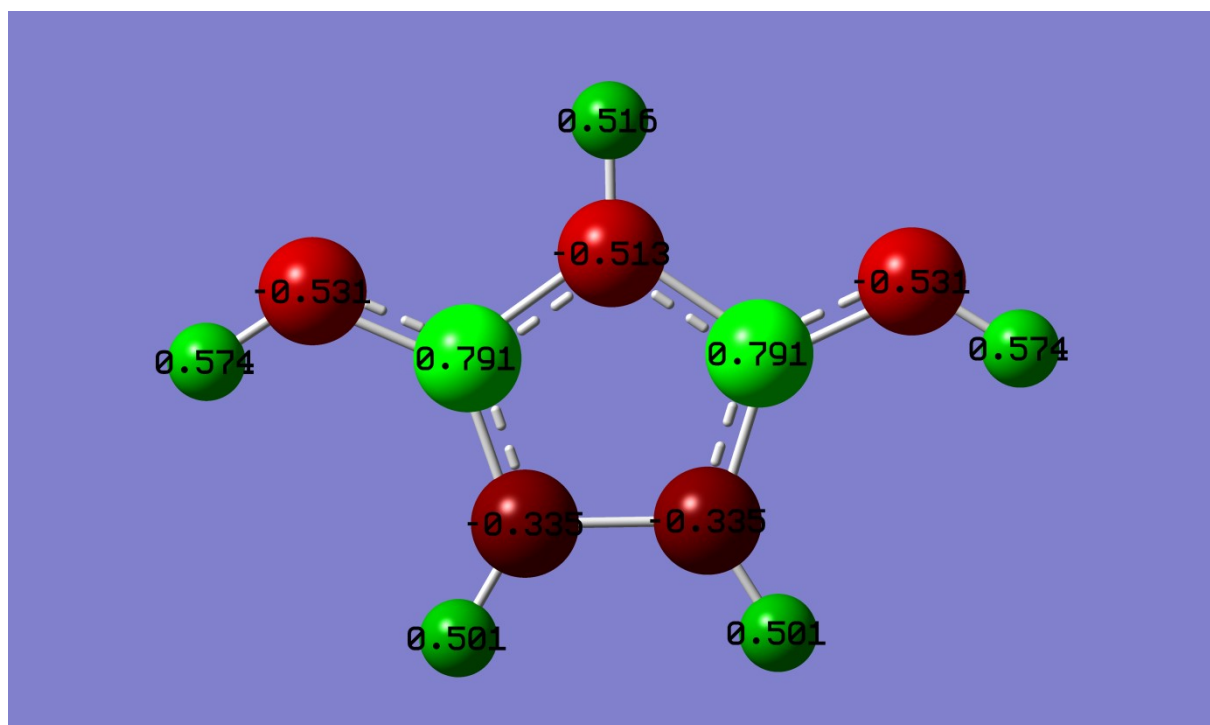

Figure 18: NPA charges of  $[C_2N_3H_3(OH)_2]$ .

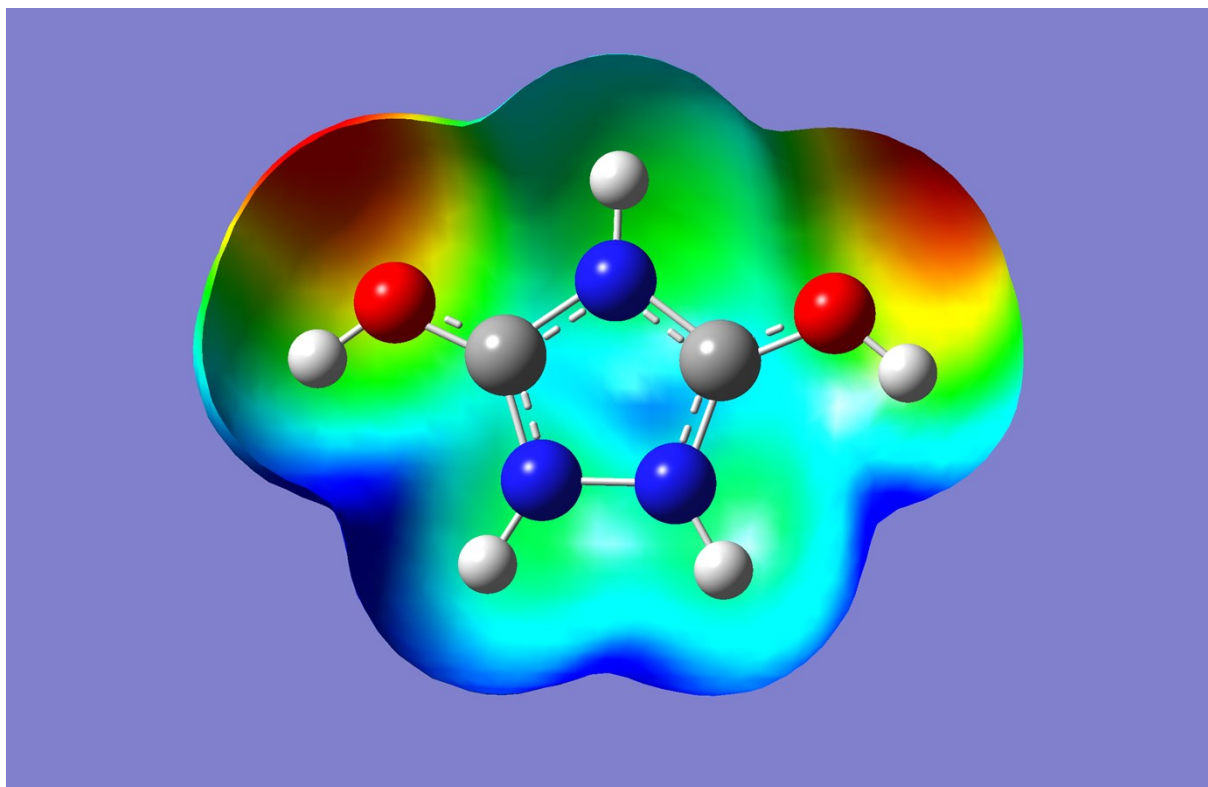

Figure 19: Molecular  $0.0004 \text{ bohr}^{-3}$  3D isosurfaces with mapped electrostatic potential of  $[\text{C}_2\text{N}_3\text{H}_3(\text{OH})_2]$  (color scale ranging from 0.26 a.u. [red] to 0.38 a.u. [blue]).

### 5.4 NPA charges

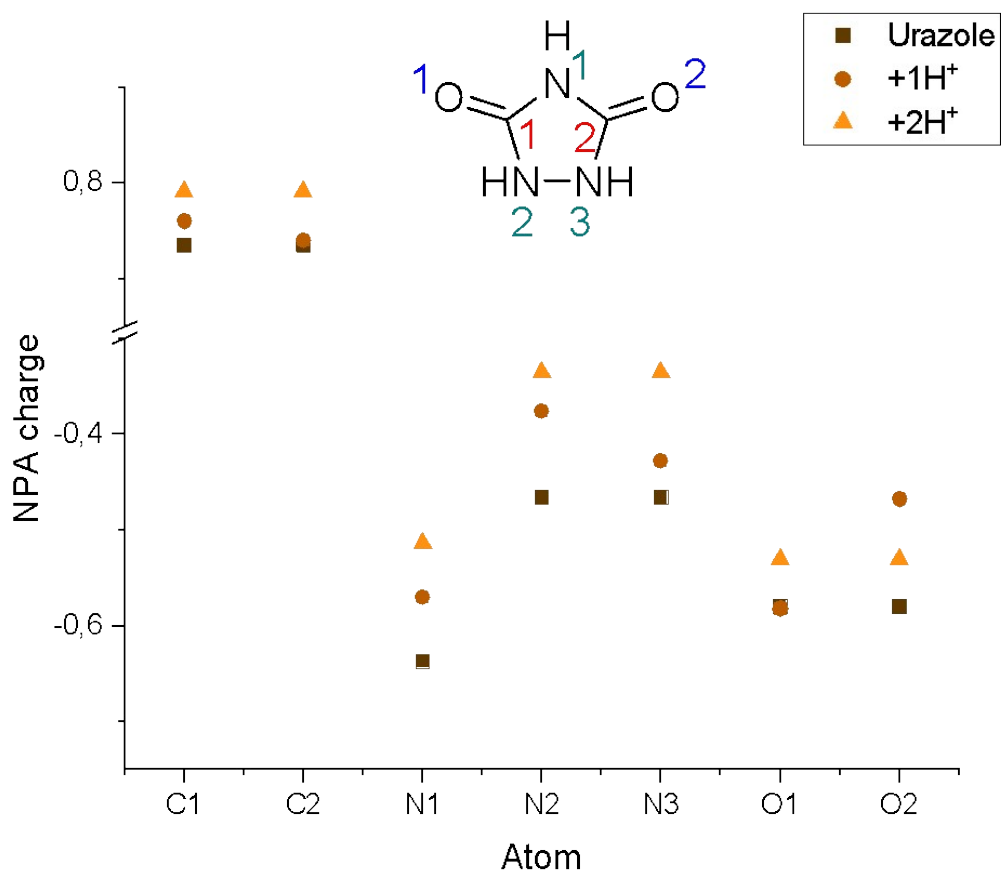

Figure 20: NPA charges of urazole and its protonated derivatives.



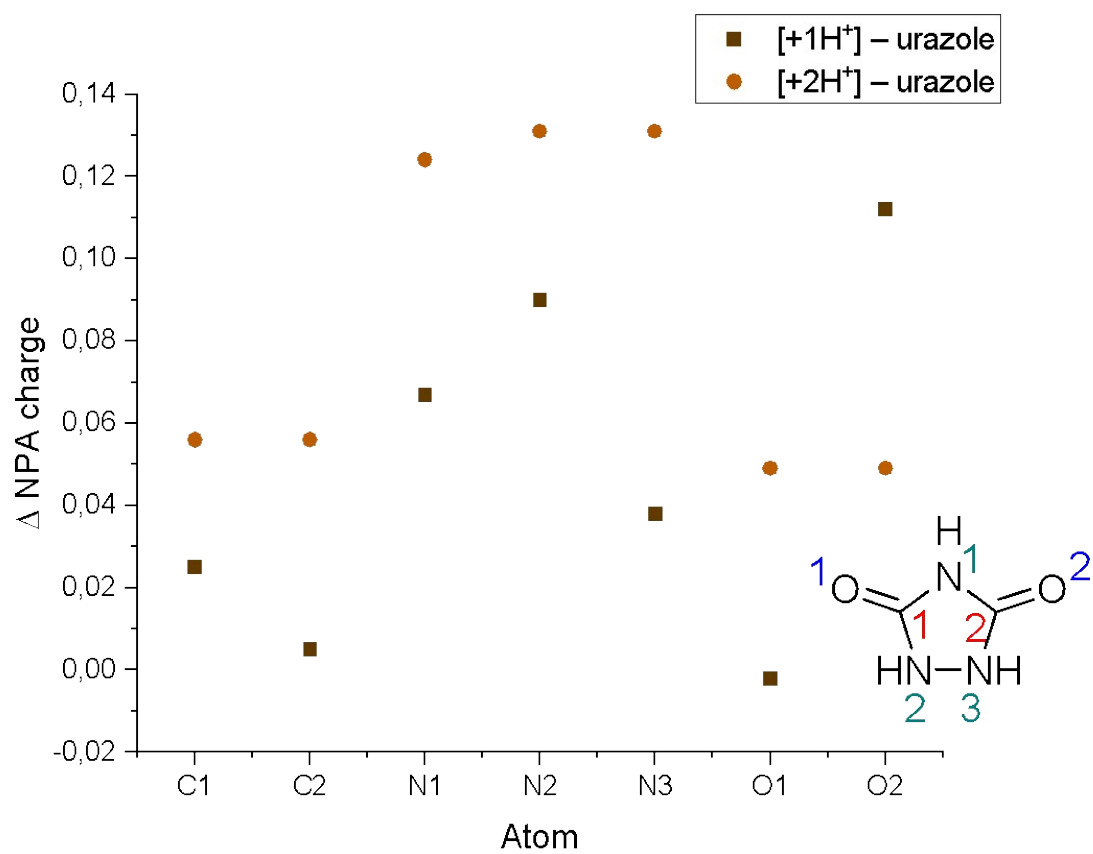

Figure 21: Difference in NPA charges of the respective protonated species vs urazole.

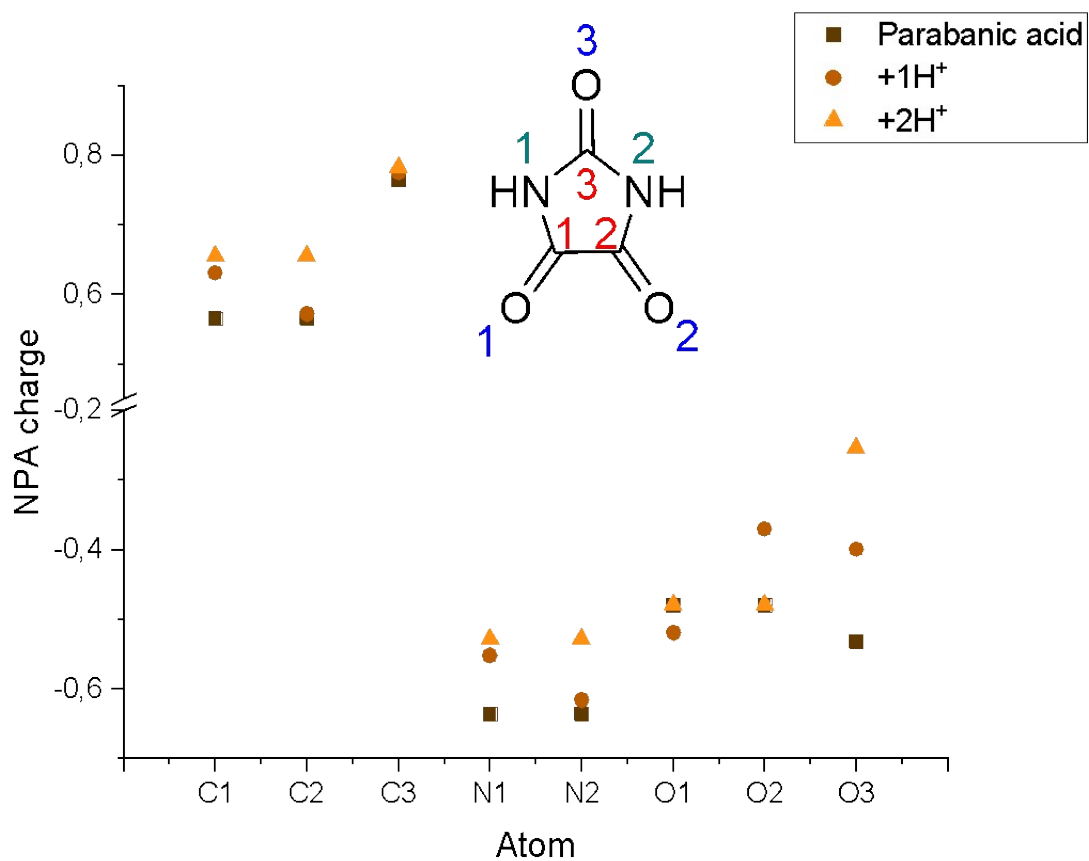

Figure 22: NPA charges of parabanic acid and its protonated derivatives.

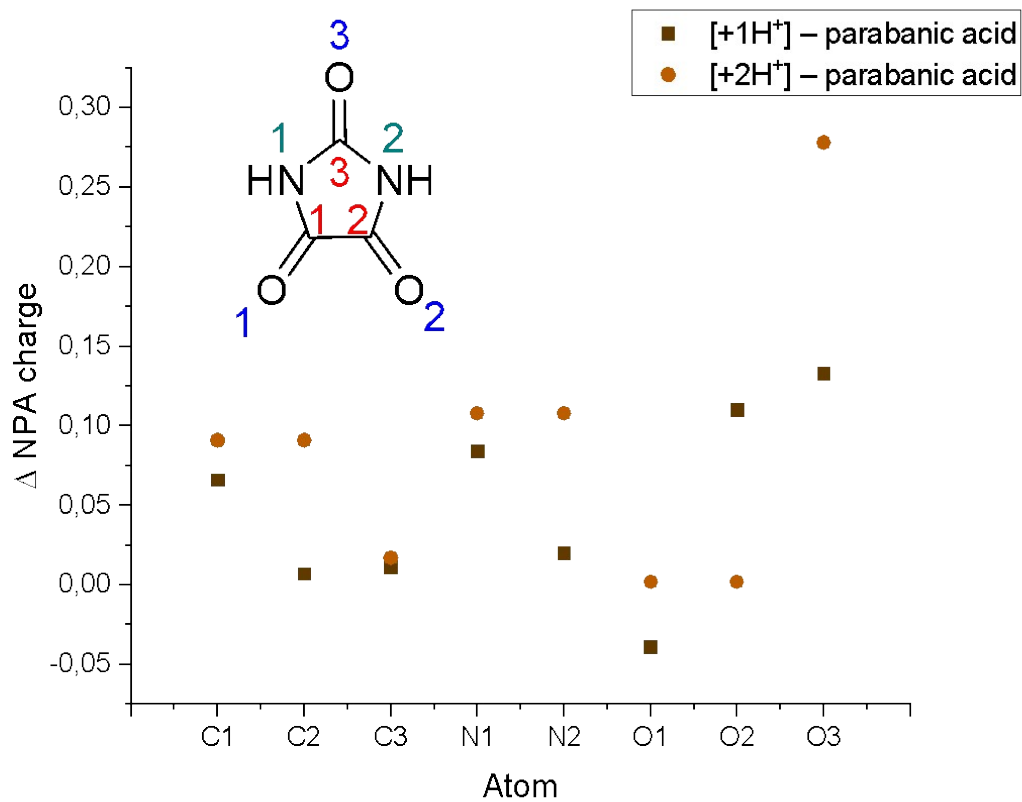

Figure 23: Difference in NPA charges of the respective protonated species vs parabanic acid.

## 6. Literature

- [1] *MestReNova 12.0.2*, Mestrelab Research S.L., **2018**.
- [2] Rigaku Oxford Diffraction, CrysAlisPro Software System, *Version 1.171.38.46*, Rigaku Corporation, Oxford, UK, **2015**.
- [3] G. M. Sheldrick, *Acta Crystallogr. A* **2015**, *71*, 3. DOI: 10.1107/S2053273314026370.
- [4] G. M. Sheldrick, *Acta Crystallogr. C* **2015**, *71*, 3. DOI: 10.1107/S2053229614024218.
- [5] L. J. Farrugia, *J. Appl. Crystallogr.* **1999**, *32*, 837. DOI: 10.1107/S0021889899006020.
- [6] A. L. Spek, *J. Appl. Crystallogr.* **2003**, *36*, 7. DOI: 10.1107/S0021889802022112.
- [7] *SCALE3 ABSPACK, An Oxford Diffraction Program*, Oxford Diffraction Ltd, UK, **2005**.
- [8] *Mercury 2020.2.0 (Build 290188)*, CCDC, **2020**.
- [9] *Gaussian 16*, M. J. Frisch, G. W. Trucks, H. B. Schlegel, G. E. Scuseria, M. A. Robb, J. R. Cheeseman, G. Scalmani, V. Barone, G. A. Petersson, H. Nakatsuji, X. Li, M. Caricato, A. V. Marenich, J. Bloino, B. G. Janesko, R. Gomperts, B. Mennucci, H. P. Hratchian, J. V. Ortiz, A. F. Izmaylov, J. L. Sonnenberg, D. Williams-Young, F. Ding, F. Lipparini, F. Egidi, J. Goings, B. Peng, A. Petrone, T. Henderson, D. Ranasinghe, V. G. Zakrzewski, J. Gao, N. Rega, G. Zheng, W. Liang, M. Hada, M. Ehara, K. Toyota, R. Fukuda, J. Hasegawa, M. Ishida, T. Nakajima, Y. Honda, O. Kitao, H. Nakai, T. Vreven, K. Throssell, J. A. Montgomery, Jr., J. E. Peralta, F. Ogliaro, M. J. Bearpark, J. J. Heyd, E. N. Brothers, K. N. Kudin, V. N. Staroverov, T. A. Keith, R. Kobayashi, J. Normand, K. Raghavachari, A. P. Rendell, J. C. Burant, S. S. Iyengar, J. Tomasi, M. Cossi, J. M. Millam, M. Klene, C. Adamo, R. Cammi, J. W. Ochterski, R. L. Martin, K. Morokuma, O. Farkas, J. B. Foresman, and D. J. Fox, Gaussian, Inc., Wallingford CT, **2016**.

- [10] *Gaussian 09*, M. J. Frisch, G. W. Trucks, H. B. Schlegel, G. E. Scuseria, M. A. Robb, J. R. Cheeseman, G. Scalmani, V. Barone, G. A. Petersson, H. Nakatsuji, X. Li, M. Caricato, A. Marenich, J. Bloino, B. G. Janesko, R. Gomperts, B. Mennucci, H. P. Hratchian, J. V. Ortiz, A. F. Izmaylov, J. L. Sonnenberg, D. Williams-Young, F. Ding, F. Lipparini, F. Egidi, J. Goings, B. Peng, A. Petrone, T. Henderson, D. Ranasinghe, V. G. Zakrzewski, J. Gao, N. Rega, G. Zheng, W. Liang, M. Hada, M. Ehara, K. Toyota, R. Fukuda, J. Hasegawa, M. Ishida, T. Nakajima, Y. Honda, O. Kitao, H. Nakai, T. Vreven, K. Throssell, J. A. Montgomery, Jr., J. E. Peralta, F. Ogliaro, M. Bearpark, J. J. Heyd, E. Brothers, K. N. Kudin, V. N. Staroverov, T. Keith, R. Kobayashi, J. Normand, K. Raghavachari, A. Rendell, J. C. Burant, S. S. Iyengar, J. Tomasi, M. Cossi, J. M. Millam, M. Klene, C. Adamo, R. Cammi, J. W. Ochterski, R. L. Martin, K. Morokuma, O. Farkas, J. B. Foresman, and D. J. Fox, Gaussian, Inc., Wallingford CT, **2016**.
- [11] F. Belaj, *Acta Cryst.* **1992**, *48*, 1088–1090.
